# Supplementary material for: Protein kinase R reveals an evolutionary model for defeating viral mimicry
Source: Springer Nature journal article supplement (doi:10.1038/nature07529), 2008-11-30
Supplement: 41586_2009_BFnature07529_MOESM218_ESM.pdf [file 41586_2009_BFnature07529_MOESM218_ESM.pdf]

## SUPPLEMENTARY INFORMATION

**Table S1.** Likelihood ratio test statistics for models of variable selective pressure along phylogenetic branches of primate PKR.

|                                                  | $\ell$   | $2\delta$ | df* | P value |
|--------------------------------------------------|----------|-----------|-----|---------|
| Model 0<br>same dN/dS ratio for all branches     | -5729.03 |           |     |         |
| Model 1<br>different dN/dS ratio for each branch | -5686.93 | 84.21     | 39  | <0.0003 |

\* denotes degrees of freedom that is equal to one less than the total number of branches in the phylogeny.

**Table S2.** Summary of positive selection in Protein Kinase R

| PKR                                       | codon<br>freq. | <i>M1-M2</i> |          | <i>M7-M8</i> |          | <i>M8a-M8</i> |          | tree<br>length | dN/dS (%) |
|-------------------------------------------|----------------|--------------|----------|--------------|----------|---------------|----------|----------------|-----------|
|                                           |                | 2 $\delta$   | p- value | 2 $\delta$   | p- value | 2 $\delta$    | p- value |                |           |
| <b>whole protein</b><br>(1-551)           | f61            | 74.7         | p<0.0001 | 75.6         | p<0.0001 | 74.3          | p<0.0001 | 1.21           | 4.1 (15%) |
|                                           | f3x4           | 71.4         | p<0.0001 | 71.9         | p<0.0001 | 71.0          | p<0.0001 | 1.20           | 3.7 (17%) |
| <b>kinase domain</b><br>(265-551)         | f61            | 71.7         | p<0.0001 | 71.7         | p<0.0001 | 71.5          | p<0.0001 | 1.16           | 7.0 (11%) |
|                                           | f3x4           | 58.1         | p<0.0001 | 58.2         | p<0.0001 | 58.0          | p<0.0001 | 1.12           | 5.5 (11%) |
| <b>spacer region</b><br>(167-264)         | f61            | 17.1         | p<0.0002 | 25.1         | p<0.0001 | 17.1          | p<0.0001 | 1.70           | 3.6 (30%) |
|                                           | f3x4           | 22.3         | p<0.0001 | 18.8         | p<0.0001 | 18.3          | p<0.0001 | 1.64           | 3.5 (38%) |
| <b>dsRNA binding<br/>domains (55-166)</b> | f61            | 4.8          | p<0.0894 | 4.9          | p<0.0848 | 4.8           | p<0.0280 | 1.11           | 2.1 (36%) |
|                                           | f3x4           | 2.0          | p<0.3639 | 2.3          | p<0.3139 | 2.0           | p<0.1552 | 1.07           | 1.5 (41%) |

**Table S3.** PKR whole gene log likelihood scores and parameter estimates for five models of variable  $\omega$  among sites assuming the f61 model of codon frequencies.

| Site model                  | Parameter estimates                                                                                                                     | Sites* with $\omega^{**}>1$                                                                                                                                                                                                                                                                                                    | $\ell$   |
|-----------------------------|-----------------------------------------------------------------------------------------------------------------------------------------|--------------------------------------------------------------------------------------------------------------------------------------------------------------------------------------------------------------------------------------------------------------------------------------------------------------------------------|----------|
| M1: neutral                 | $(\omega_0=0) f_0=0.461$<br>$(\omega_1=1) f_1=0.539$<br>branch $\omega$ (mean)=0.553                                                    |                                                                                                                                                                                                                                                                                                                                | -5664.28 |
| M2: selection               | $(\omega_0=0.1) f_0=0.452$<br>$(\omega_1=1) f_1=0.397$<br><b><math>(\omega_2=4.0) f_2=0.151</math></b><br>branch $\omega$ (mean)=1.042  | 7 A 0.929<br>122 A 0.962<br>123 S 0.918<br>206 G 0.969<br>224 S 0.981<br>242 S 0.978<br>259 V 0.996<br>261 K 0.982<br>265 M 0.992<br>344 S 1.000<br>351 S 0.955<br>376 Q 0.907<br>380 K 0.992<br>462 S 0.902<br>489 F 0.998<br>496 T 0.999<br>502 I 0.976<br>503 I 0.923<br>538 V 0.949                                        | -5626.94 |
| M7: $\beta$                 | $p=0.00759$<br>$q=0.00500$<br>branch $\omega$ (mean)=0.600                                                                              |                                                                                                                                                                                                                                                                                                                                | -5664.95 |
| M8a: $\beta$ and $\omega=1$ | $p=3.16777$<br>$q=99.00000$ ( $f_0=0.460$ )<br>$\omega_1=1$ ( $f_1=0.540$ )<br>branch $\omega$ (mean)=0.554                             |                                                                                                                                                                                                                                                                                                                                | -5664.30 |
| M8: $\beta$ and $\omega$    | $p=0.12863$<br>$q=0.11990$ ( $f_0=0.849$ )<br><b><math>\omega_1=4.1</math> (<math>f_1=0.151</math>)</b><br>branch $\omega$ (mean)=1.050 | 6 S 0.901<br>7 A 0.967<br>24 V 0.936<br>44 Q 0.917<br>49 G 0.942<br>86 L 0.929<br>122 A 0.985<br>123 S 0.957<br>125 V 0.933<br>139 Q 0.944<br>185 T 0.935<br>206 G 0.988<br>242 S 0.991<br>255 T 0.982<br>259 V 0.999<br>261 K 0.993<br>265 M 0.997<br>275 S 0.944<br>322 H 0.935<br>330 F 0.947<br>336 T 0.939<br>338 D 0.942 | -5627.16 |

|  |  |       |       |  |
|--|--|-------|-------|--|
|  |  | 344 S | 1.000 |  |
|  |  | 351 S | 0.980 |  |
|  |  | 376 Q | 0.957 |  |
|  |  | 380 K | 0.997 |  |
|  |  | 462 S | 0.947 |  |
|  |  | 489 F | 0.999 |  |
|  |  | 492 S | 0.920 |  |
|  |  | 496 T | 1.000 |  |
|  |  | 502 I | 0.989 |  |
|  |  | 506 I | 0.964 |  |
|  |  | 516 Q | 0.933 |  |
|  |  | 538 V | 0.977 |  |

\* sites with posterior probabilities >0.90 by Bayes Empirical Bayes (BEB) analysis

\*\*  $\omega = (dN/dS)$

**Table S4.** Likelihood ratio test statistics for PARRIS analysis of PKR whole gene.

|                                   | $\ell$  | $2\delta$ | P value | Parameter estimates                                                                                                              |
|-----------------------------------|---------|-----------|---------|----------------------------------------------------------------------------------------------------------------------------------|
| Null model (M1): no selection     | -5637.1 |           |         |                                                                                                                                  |
| Alternative model (M2): selection | -5618.0 | 38        | <0.0001 | $\omega_0=0.14$ ( $f_0=0.449$ )<br>$\omega_1=1.00$ ( $f_1=0.173$ )<br><b><math>\omega_2=2.31</math> (<math>f_2=0.378</math>)</b> |

**Table S5.** Likelihood ratio test statistics for PARRIS analysis of PKR whole gene taking into account one recombination breakpoint supported by GARD analysis\*.

|                                   | $\ell$  | $2\delta$ | P value | Parameter estimates                                                                                   |
|-----------------------------------|---------|-----------|---------|-------------------------------------------------------------------------------------------------------|
| Null model (M1): no selection     | -7147.1 |           |         |                                                                                                       |
| Alternative model (M2): selection | -7135.1 | 24        | <0.0001 | $\omega_0=0.48$ ( $f_0=0.430$ )<br>$\omega_1=1.00$ ( $f_1=0.307$ )<br>$\omega_2=2.22$ ( $f_2=0.263$ ) |

\*GARD predicted a breakpoint at nucleotide 1006 ( $\Delta$  c-AIC = 27.02).

**Table S6.** Summary of lineage specific positive selection in Protein Kinase R (PAML)

| PKR                                  | codon freq. | <i>M1-M2</i> |          | <i>M7-M8</i> |          | <i>M8a-M8</i> |          | tree length | dN/dS (%) |
|--------------------------------------|-------------|--------------|----------|--------------|----------|---------------|----------|-------------|-----------|
|                                      |             | 2 $\delta$   | p- value | 2 $\delta$   | p- value | 2 $\delta$    | p- value |             |           |
| <b>hominoid</b><br>8 species         | f61         | 12.5         | p<0.002  | 12.5         | p<0.002  | 12.5          | p<0.0005 | 0.24        | 3.1 (32%) |
|                                      | f3x4        | 11.9         | p<0.003  | 13.1         | p<0.002  | 11.9          | p<0.0006 | 0.24        | 3.0 (33%) |
| <b>old world monkey</b><br>7 species | f61         | 77.3         | p<0.0001 | 77.6         | p<0.0001 | 77.3          | p<0.0001 | 0.38        | 9.2 (15%) |
|                                      | f3x4        | 82.0         | p<0.0001 | 82.4         | p<0.0001 | 82.0          | p<0.0001 | 0.39        | 9.7 (15%) |
| <b>new world monkey</b><br>6 species | f61         | 18.1         | p<0.0002 | 18.3         | p<0.0002 | 18.1          | p<0.0001 | 0.39        | 5.4 (8%)  |
|                                      | f3x4        | 17.4         | p<0.0002 | 17.8         | p<0.0002 | 17.4          | p<0.0001 | 0.39        | 5.4 (7%)  |

**Table S7.** PKR spacer region log likelihood scores and parameter estimates for five models of variable  $\omega$  among sites assuming the f61 model of codon frequencies.

| Site model                  | Parameter estimates                                                                                                                    | Sites with $\omega > 1$                                                                               | $\ell$   |
|-----------------------------|----------------------------------------------------------------------------------------------------------------------------------------|-------------------------------------------------------------------------------------------------------|----------|
| M1: neutral                 | $(\omega_0=0) f_0=0.201$<br>$(\omega_1=1) f_1=0.799$<br>branch $\omega$ (mean)=0.799                                                   |                                                                                                       | -1192.00 |
| M2: selection               | $(\omega_0=0.0) f_0=0.147$<br>$(\omega_1=1) f_1=0.543$<br><b><math>(\omega_2=3.5) f_2=0.310</math></b><br>branch $\omega$ (mean)=1.633 | 206 G 0.977<br>224 S 0.920<br>242 S 0.981<br>255 T 0.957<br>259 V 0.997<br>261 K 0.984                | -1183.43 |
| M7: $\beta$                 | $p=15.07816$<br>$q=0.00500$<br>branch $\omega$ (mean)=1.000                                                                            |                                                                                                       | -1195.98 |
| M8a: $\beta$ and $\omega=1$ | $p=0.00500$<br>$q=1.60970 (f_0=0.201)$<br>$\omega_1=1 (f_1=0.799)$<br>branch $\omega$ (mean)=0.799                                     |                                                                                                       | -1192.00 |
| M8: $\beta$ and $\omega$    | $p=0.01990$<br>$q=0.00500 (f_0=0.697)$<br><b><math>\omega_1=3.6 (f_1=0.303)</math></b><br>branch $\omega$ (mean)=1.638                 | 185 T 0.935<br>206 G 0.991<br>224 S 0.967<br>242 S 0.992<br>255 T 0.983<br>259 V 0.998<br>261 K 0.993 | -1183.43 |



**Table S8.** PKR kinase domain log likelihood scores and parameter estimates for five models of variable  $\omega$  among sites assuming the f61 model of codon frequencies.

| Site model                  | Parameter estimates                                                                                                                     | Sites with $\omega > 1$                                                                                                                                                                                                                                                    | $\ell$   |
|-----------------------------|-----------------------------------------------------------------------------------------------------------------------------------------|----------------------------------------------------------------------------------------------------------------------------------------------------------------------------------------------------------------------------------------------------------------------------|----------|
| M1: neutral                 | $(\omega_0=0.01) f_0=0.483$<br>$(\omega_1=1) f_1=0.517$<br>branch $\omega$ (mean)=0.523                                                 |                                                                                                                                                                                                                                                                            | -2789.37 |
| M2: selection               | $(\omega_0=0) f_0=0.386$<br>$(\omega_1=1) f_1=0.507$<br><b><math>(\omega_2=6.7) f_2=0.107</math></b><br>branch $\omega$ (mean)=1.228    | 265 M 0.998<br>275 S 0.932<br>322 H 0.923<br>330 F 0.935<br>336 T 0.936<br>338 D 0.922<br>344 S 1.000<br>351 S 0.980<br>376 Q 0.912<br>380 K 0.998<br>462 S 0.932<br>489 F 1.000<br>492 S 0.905<br>496 T 1.000<br>502 I 0.993<br>506 I 0.946<br>516 Q 0.900<br>538 V 0.974 | -2753.52 |
| M7: $\beta$                 | $p=0.01911$<br>$q=0.01698$<br>branch $\omega$ (mean)=0.509                                                                              |                                                                                                                                                                                                                                                                            | -2789.47 |
| M8a: $\beta$ and $\omega=1$ | $p=0.04150$<br>$q=3.80019$ ( $f_0=0.474$ )<br>$\omega_1=1$ ( $f_1=0.526$ )<br>branch $\omega$ (mean)=0.529                              |                                                                                                                                                                                                                                                                            | -2789.40 |
| M8: $\beta$ and $\omega$    | $p=0.00762$<br>$q=0.00507$ ( $f_0=0.894$ )<br><b><math>\omega_1=7.0</math> (<math>f_1=0.106</math>)</b><br>branch $\omega$ (mean)=1.274 | 265 M 0.999<br>275 S 0.965<br>322 H 0.961<br>330 F 0.974<br>336 T 0.967<br>338 D 0.970<br>344 S 1.000<br>351 S 0.991<br>376 Q 0.966<br>380 K 0.999<br>462 S 0.964<br>489 F 1.000<br>492 S 0.951<br>496 T 1.000<br>502 I 0.997<br>506 I 0.978<br>516 Q 0.949<br>538 V 0.989 | -2753.63 |

**Table S9.** Spidermonkey/BGM analysis of co-evolution between amino acid positions in PKR phylogeny ( $P^* > 0.5$ ).\*\*

| Site 1*** | Site 2*** | P*   | notes                                                  |
|-----------|-----------|------|--------------------------------------------------------|
| E379      | S492      | 0.65 | 492 positive selection, 379 contacts eIF2 $\alpha$     |
| S6        | Q376      | 0.66 | both under positive selection, 376 in helix $\alpha$ D |
| K261      | T336      | 0.59 | both under positive selection                          |
| A7        | S192      | 0.70 | 7 under positive selection                             |

\* posterior probability for site 1 and site 2 being conditionally dependent

\*\* one parent undirected analysis for all variable sites with a threshold of 3 branches with non-synonymous substitutions

\*\*\* amino acid shown for each position is from human PKR

**Table S10.** Primers used to amplify primate PKR.

| Primer        | Sequence                           |
|---------------|------------------------------------|
| <b>PKR-F1</b> | 5'-CTGTGATTATCTGCGTGCATTTTGG-3'    |
| <b>PKR-R1</b> | 5'-CTAAGGAAAATTGCATATCAGAAGCAGG-3' |
| <b>PKR-F2</b> | 5'-GAAATGGCTGGTGATCTTTCAGCAGG-3'   |
| <b>PKR-R2</b> | 5'-GGATACTTTTCAGAAGGGCTCTAACA-3'   |

**Table S11.** Genotypes of yeast strains used in this study.

| Strain | Genotype                                                                                                           | Source     |
|--------|--------------------------------------------------------------------------------------------------------------------|------------|
| H2557  | <i>MAT<math>\alpha</math> ura3-51 leu2-3 leu2-112 gcn2<math>\Delta</math></i>                                      | Ref. 21    |
| J223   | <i>MAT<math>\alpha</math> ura3-51 leu2-3 leu2-112 trp1-<math>\Delta</math>63 gcn2<math>\Delta</math> SUI2-S51A</i> | Ref. 21    |
| HM1    | <i>MAT<math>\alpha</math> ura3-51 leu2-3 leu2-112 gcn2<math>\Delta</math> (GAL-CYC1-K3L LEU2) at leu2</i>          | this study |
| HM2    | <i>MAT<math>\alpha</math> ura3-51 leu2-3 leu2-112 gcn2<math>\Delta</math> (GAL-CYC1-HA-K3L LEU2) at leu2</i>       | this study |
| HM3    | <i>MAT<math>\alpha</math> ura3-51 leu2-3 leu2-112 gcn2<math>\Delta</math> (GAL-CYC1 LEU2) at leu2</i>              | this study |
| HM4    | <i>MAT<math>\alpha</math> ura3-51 leu2-3 leu2-112 gcn2<math>\Delta</math> (GAL-CYC1-K3L-variola LEU2) at leu2</i>  | this study |
