# Supplementary material for: Protein kinase R reveals an evolutionary model for defeating viral mimicry
Source: Springer Nature journal article supplement (doi:10.1038/nature07529), 2008-11-30
Supplement: 41586_2009_BFnature07529_MOESM219_ESM.pdf [file 41586_2009_BFnature07529_MOESM219_ESM.pdf]

## SUPPLEMENTARY INFORMATION

## Supplementary data

## Dataset 1: Comparison of reconstructed OWM ancestors at 22:0 (N:S) branch.

CLUSTAL 2.0.8 multiple sequence alignment

```

pk_r_node27      ATGGCTGGTGATCTTGCACCAGGTTTCTTCATGGAGGAACTTAATAAATACCGTCAGAAG 60
pk_r_node28      ATGGCTGGTGATCTTGCACCAGGTTTCTACATGGAGGAACTTAATAAATACCGTCAGAAG 60
*****

pk_r_node27      CAGGGAATAACACTTAGCTATCAAGAAGTGCCTAATACAGGACCTCCACATGATAGGAG 120
pk_r_node28      CAGGGAATAACATTTAGCTATCAAGAAGTGCCTAATACAGGACCTCCACATGATAGGAG 120
*****

pk_r_node27      TTTACATTTGAGTTATAACAGATAGAAGAGAATTTCCAGAAGCTGAAGGTAGATCAAAG 180
pk_r_node28      TTTACATTTGAGTTGTAACAGATAGAAGAGAATTTCCAGAAGCTGAAGGTAGATCAAAG 180
*****

pk_r_node27      AAGGAAGCAAAAAATGCTGCAGCCAAATTAGCTGTTGAGATACTTAATAAGGAAAGCAAG 240
pk_r_node28      AAGGAAGCAAAAAATGCTGCAGCCAAATTAGCTGTTGATATACTTAATAAGGAAAGCAAG 240
*****

pk_r_node27      GCAGTTAGTCCTTTTTTCATTGACAACAACCAGTTCTTCGGAAGGATCCATTGGGAATTAC 300
pk_r_node28      GCAGTTAGTCCTTTTTTCATTGACAACAACCAGTTCTTCGGAAGGATCCATTGGGAATTAC 300
*****

pk_r_node27      ATAGGCGTTGTCAATAGAATTGCCCAGAAGAAAAGACTAACTGTAAATTATGAACAATGT 360
pk_r_node28      ATAGGCGTTGTCAATAGAATTGCCCAGAAGAAAAGACTAACTGTAAATTATGAACAATGT 360
*****

pk_r_node27      ACATCGGGGGTGCATGGGCCAGAAGGATTTTCATTATAAATGCAAAATGGGACAGAAAGAA 420
pk_r_node28      ACATCGGGGGTGCATGGGCCAGAAGGATTTTCATTATAAATGCAAAATGGGAGAGAAAGAA 420
*****

pk_r_node27      TATAGTATTGGTACAGGTTCTACTAAACAGGAAGCAAAACAATTGGCCGCTAAACTTGCA 480
pk_r_node28      TATAGTATTGGTACAGGTTCTACTAAACAGGAAGCAAAACAATTGGCCGCTAAACTTGCA 480
*****

pk_r_node27      TTTCTTGAGATATCAGAAGAAACCTCAGTGAAACCTGACTCCATGTCTCTGGTTCTTTT 540
pk_r_node28      TTGCTTGAGATATCAGAAGAAACCTCAGTGAAACCTGACTCCATGTCTCTGGTTCTTTT 540
** *****

pk_r_node27      GCTGCTACGTGTGACTCCCAAAGCAACCCTTTAGTGAACAACCTCACTTGCTTCTGAATCA 600
pk_r_node28      GCTGCTACGTGTGACTCCCAAAGCAACCCTTTAGTGAACAACCTCACTTGCTTCTGAATCA 600
*****

pk_r_node27      TCATCTGAAAGTGACGTCTCAGCAGATACATCAGAGATAAATTCTAACAGTAGTTTAAAC 660
pk_r_node28      TCATCTGAAAGTGACGTCTCAGCAGATACATCAGAGATAAATTCTAACAGTAGTTTAAAC 660
*****

pk_r_node27      AATTCTTCATTGTTTACGAATGGTCTCAGAAATAACCAAAGGAAGGCAAAAAGATCTTTG 720
pk_r_node28      AATTCTTCATTGTTTACGAATGGTCTCAGAAATAACCAAAGGAAGGCAAAAAGATCTTTG 720
*****

```

pkr\_node27 GCACCTAGATTTGACCCCTCTGACATGAAAGGAACAAAGTATACTGCGGATGCAAGGTTT 780  
 pkr\_node28 GCACCTACATTTGACCCCTCTGACATGAAAGGACCAAAGTATACTGAGGATGCAAGGTTT 780  
 \*\*\*\*\*

pkr\_node27 GGCACGGATTTTAAAGAAATAGAATTCATTAGCTCGGGTGGATTTGGCCAAGTTTTCAA 840  
 pkr\_node28 GGCACGGATTTTAAAGAAATAGAATTCATTAGCGTGGGTGGATTTGGCCAAGTTTTCAA 840  
 \*\*\*\*\*

pkr\_node27 GCAAAACACAGAATTGACGGAAAGACTTACGTTATTAACGTGTTAAATATAATAGCGAG 900  
 pkr\_node28 GCAAAACACAGAATTGACGGAAAGACTTACGTTATTAACGTGTTAAATATAATAGCAAG 900  
 \*\*\*\*\*

pkr\_node27 AAGGCAGAGCGTGAAGTAAAAGCATTGGCAAAACTTGATCATGTAAATATTGTTCACTAC 960  
 pkr\_node28 AAGGCAGAGCGTGAAGTAAAAGCATTGGCAAAACTTGATCATGTAAATATTGTTCACTAC 960  
 \*\*\*\*\*

pkr\_node27 AATGGCTGTTGGGATGGACTTGATTATGATCCTGAGATCAGTGCTTATGATCCTGAGAGC 1020  
 pkr\_node28 AATGGCTGTTGGGATGGACTTGATTATGATCCTGAGATCAGTGCTTATGATCCTGAGAGC 1020  
 \*\*\*\*\*

pkr\_node27 CCTGATTATGATCCTGAGAACAGCAAAAATAGTTCAAGATCAAAGACTAAGTGCCTTTTC 1080  
 pkr\_node28 CCTGATTTTATGATCCTGAGAACAAAAAATAGTTTAAAGATCAAAGACTAAGTGCCTTTTC 1080  
 \*\*\*\*\*

pkr\_node27 ATCCAAATGGAATTCTGTGAAAAAGGGACATTGGAGCAATGGATTGAAGATAGAAGAGGC 1140  
 pkr\_node28 ATCCAAATGGAATTCTGTGAAAAAGGGACATTGGAGGAATGGATTGAAGATAGAAAAGGC 1140  
 \*\*\*\*\*

pkr\_node27 AAGAACTAGACAAAAGTTTTGGCTTTGGAACCTTTTGAACAAATAACAAAAGGGGTGGAT 1200  
 pkr\_node28 AAGAACTAGACAAAAGTTTTGGCTTTGGAACCTTTTGAACAAATAACAAAAGGGGTGGAT 1200  
 \*\*\*\*\*

pkr\_node27 TATATACATTCAAAAAATATAATTCATAGAGATCTTAAGCCAAGTAATATATTCTTAGTA 1260  
 pkr\_node28 TATATACATTCAAAAAATATAATTCATAGAGATCTTAAGCCAAGTAATATATTCTTAGTA 1260  
 \*\*\*\*\*

pkr\_node27 GATACAAAACAAAATAAAGATTGGAGACTTTGGACTTGCAACATCTCTGAAAAATGATGGA 1320  
 pkr\_node28 GATACAAAACAAAATAAAGATTGGAGACTTTGGACTTGCAACATCTCTGAAAAATGATGGA 1320  
 \*\*\*\*\*

pkr\_node27 AAGCGAACAAGGAATACGGGAACCTTTGCGATACATGAGCCCAGAACAGATTTCTTCGCAA 1380  
 pkr\_node28 AAGCGAACAAGGAATACGGGAACCTTTGCGATACATGAGCCCAGAACAGATTTCTTCGCAA 1380  
 \*\*\*\*\*

pkr\_node27 GACTATGAAAAGGAAGTGGACCTCTACGCTTTGGGGCTAATTCTTGCTGAACTTCTTCAT 1440  
 pkr\_node28 GACTATGAAAAGGAAGTGGACCTCTACGCTTTGGGGCTAATTCTTGCTGAACTTCTTCAT 1440  
 \*\*\*\*\*

pkr\_node27 GTATGTGACACTGCTTTTCGAAACATCAAAGTTTTTCAAAGACCTACGGGATGGCATCATC 1500  
 pkr\_node28 GTATGTGACACTGCTTTCCGAAACATCAAAGTTTTTCAAAGACCTACGGGATGGCACCATC 1500  
 \*\*\*\*\*

pkr\_node27 TCAGATGTGTTTGATAAAAAGAGAAAAAATCTTCTAGAGAAATTACTCTCAAAGAAACCT 1560  
 pkr\_node28 TCAGATGTGTTTGATAAAAAGAGAAAAAATCTTCTAGAGAAATTACTCTCAAAGAAACCT 1560  
 \*\*\*\*\*

```
pk_r_node27      GAGGACCGACCTAACACATCTGAAATACTAAGCACCTTGACTACGTGGAAGAAAAGCCCA 1620
pk_r_node28      GAGGACCGACCTAACACATCTGAAATACTAAGCACCTTGACTACGTGGAAGAAAAGCCCA 1620
                  *****
pk_r_node27      GAGAAAAAG 1629
pk_r_node28      GAGAAAAAG 1629
                  *****
```



pkr\_hum TTTACATTTCAAGTTATAATAGATGGAAGAGAATTTCCAGAAGGTGAAGGTAGATCAAAG 180  
 pkr\_chi TTTACATTTTCGAGTTATAATAGATGGAAGAGAATTTCCAGAAGGTGAAGGTAGATCAAAG 180  
 pkr\_bon TTTACATTTTCGAGTTATAATAGATGGAAGAGAATTTCCAGAAGGTGAAGGTAGATCAAAG 180  
 pkr\_gor TTTACATTTTCGAGTTATAATAGATGAAAGAGAATTTCCAGAAGGTGAAGGTAGATCAAAG 180  
 pkr\_ora TTTACATTTTCGAGTTATAATAGACGGAAGAGAATTTCCAGAAGCCGAAGGTAGATCAAAG 180  
 pkr\_agi TTTACATTTTCGAGTTATAATAGATGAAAGAGAATTTCCAGAAGCTGAAGGTAGATCAAAG 180  
 pkr\_wcg TTTACATTTTCGAGTTATAATAGATGAAAGAGAATTTCCAGAAGCTGAAGGTAGATCAAAG 180  
 pkr\_isi TTTACATTTTCGAGTTATAATAGATGAAAGAGAATTTCCAGAAGCTGAAGGTAGATCAAAG 180  
 pkr\_smg TTTACATTTCAAGTTGTAACAGATAGAAGAAAATTTCCAGAAGCTGAAGGTAGATCAAAG 180  
 pkr\_rhe TTTACATTTCAAGTTGTAACAGATAGAAGAACAATTTCCAGAAGCTGAAGGTAGATCAAAG 180  
 pkr\_tal TTTACATTTTCGAGTTGTAACAGATAGAAGAGAATTTCCAGAAGCTGAAGGTAGATCAAAG 180  
 pkr\_pat TTTACATTTTCGAGTTGTAACAGATAGAAGAGAATTTCCAGAAGCTGAAGGTAGATCAAAG 180  
 pkr\_agm TTTACATTTTCGAGTTGTAACAGATAGAAGAGAATTTCCAGAAGCTGAAGGTAGATCAAAG 180  
 pkr\_flg TTTACTTTTTCGAGTTATATCAGATAGAAGAGAATTTCCAGAAGCTGAAGGTAGATCAAAG 180  
 pkr\_col TTTACATTTTCGAGTTATATCAGATAAAAAGACAATTTCCAGAAGCTGAAGGTAGATCAAAG 180  
 pkr\_woo TTTACATTTCAAGTTATAATAGATGGGAGAGAATTTCCAGAAGCTGAAGGTAGATCAAAA 180  
 pkr\_spi TTTACATTTCAAGTTATAATAGATGGGAGAGAATTTCCAGAAGCTGAAGGTAGATCAAAA 180  
 pkr\_tit TTTACATTTCAAGTTATAATAGATGGGAGAGAATTTCCAGAAGCTGAAGGTAGATCAAAA 180  
 pkr\_owl TTTACATTTCAAGTTATAATAGATGGGAGAGAATTTCCAGAAGCTGAAGGTAAATCAAAA 180  
 pkr\_tam TTTACATTTCAAGTTATAATAGATGGGAGAGAATTTCCAGAAGCTGAAGGTAGATCAAAA 180  
 pkr\_mar TTTGCATTTCAAGTTATAATAGATGGGAGAGAATTTCCAGAAGCTGAAGGTAGATCAAAA 180

\*\*\* \* \*\*\*\* \*\*\*\*\* \*\* \*\*\* \*\* \* \*\*\*\*\* \*\*\*\*\* \*\*\*\*\* \*\*\*\*\*

pkr\_hum AAGGAAGCAAAAAATGCCGCAGCCAAATTAGCTGTTGAGATACTTAATAAGGAAAAGAAG 240  
 pkr\_chi AAGGAAGCAAAAAATGCCGCAGCCAAATTAGCTGTTGAGATACTTAATAAGGAAAAGAAG 240  
 pkr\_bon AAGGAAGCAAAAAATGCCGCAGCCAAATTAGCTGTTGAGATACTTAATAAGGAAAAGAAG 240  
 pkr\_gor AAGGAAGCAAAAAATGCCGCAGCCAAATTAGCTGTTGAGATACTTAATAAGGAAAAGAAG 240  
 pkr\_ora AAGGAAGCAAAAAATGCCGCAGCCAAATTAGCTGTTGAGATACTTAATAAGGAAAAGAAG 240  
 pkr\_agi AAGGAAGCAAAAAATGCTGCAGCCAAATTAGCTGTTGAGATACTTAATAAGGAAAAGAAG 240  
 pkr\_wcg AAGGAAGCAAAAAATGCTGCAGCCAAATTAGCTGTTGAGATACTTAATAAGGAAAAGAAG 240  
 pkr\_isi AAGGAAGCAAAAAATGCTGCAGCCAAATTAGCTGTTGAGATACTTAATAAGGAAAAGAAG 240  
 pkr\_smg AAGGAAGCAAAAAATGCTGCAGCCAAATTAGCTGTTGATATACTTAATAAGGAAAAGCGAG 240  
 pkr\_rhe AAGGAAGCAAAAAATGCTGCAGCCAAATTAGCTGTTGATATACTTAATAAGGAAAAGCGAG 240  
 pkr\_tal AAGGAAGCAAAAAATGCTGCAGCCAAATTAGCTGTTGATATACTTAATAAGGAAAAGCAAG 240  
 pkr\_pat AAGGAAGCAAAAAATGCTGCAGCCAAATTAGCTGTTGATATACTTAATAAGGAAAAGCAAG 240  
 pkr\_agm AAGGAAGCAAAAAATGCTGCAGCCAAATTAGCTGTTGATATACTTAATAAGGAAAAGCAAG 240  
 pkr\_flg AAGGAAGCAAAAAATGCTGCAGCCAAATTAGCTGTTGAGATACTTAATAAGGAAAAGCAAG 240  
 pkr\_col AAGGAGGCAAAAAATGCTGCAGCCAAATTAGCTGTTGAGATACTTAATAAGGAAAAGCAAG 240  
 pkr\_woo AAGGAAGCAAAAAATGCCGCAGCCAAAGTAGCTGTTGAGATACTTAATAAGGAAAACAAG 240  
 pkr\_spi AAGGAAGCAAAAAATGCCGCAGCCAAAGTAGCTGTTGAGATACTTAATAAGGAAAACAAG 240  
 pkr\_tit AAGGAAGCAAAAAATGCCGCAGCCAAAGTAGCTGTTGAGATACTTAATAAGGAAAACAAG 240  
 pkr\_owl AAGGAAGCAAAAAATGCCGCAGCCAAAGTAGCTGTTGAGATACTTAATAAGGAAAACAAG 240  
 pkr\_tam AAGGAAGCAAAAAATGCCGCAGCCAAAGTAGCTGTTGAGATACTTAATAAGGAAAACAAG 240  
 pkr\_mar AAGGAAGCAAAAAATGCCGCAGCCAAAGTAGCTGTTGAGATACTTAATAAGGAAAACAAG 240

\*\*\*\*\* \*\* \* \*\*\*\*\* \*\*\*\*\* \*\*\*\*\* \*\*\*\*\* \*\*\*\*\* \*\*\*\*\* \*\*\*\*\*



pkr\_hum TGTGCATCGGGGGTGCATGGGCCAGAAGGATTTTCATTATAAATGCAAAATGGGACAGAAA 420  
 pkr\_chi TGTGCATCGGGGGTGCATGGGCCAGAAGGATTTTCATTATAAATGCAAAATGGGACAGAAA 420  
 pkr\_bon TGTGCATCGGGGGTGCATGGGCCAGAAGGATTTTCATTATAAATGCAAAATGGGACAGAAA 420  
 pkr\_gor TGTGCATCGGGGGTGCATGGGCCAGAAGGATTTTCATTATAAATGCAAAATGGGACAGAAA 420  
 pkr\_ora TGTGCATCGGGGGTGCATGGGCTAGAAGGATTTTCATTATAAATGCAAAATGGGACAGAAA 420  
 pkr\_agi TGTGGATGGGGGTGCATGGGACAAAAGGATTTTCATTATAAATGCAAAATGGGACAGAAA 420  
 pkr\_wcg TGTGTATCGGGGGTGCATGGGCCAAAAGGATTTTCATTATAAATGCAAAATGGGACAGAAA 420  
 pkr\_isi TGTGGATGGGGGGTGCATGGGCCAAAAGGATTTTCATTATAAATGCAAAATGGGACAGAAA 420  
 pkr\_smg TGTACATCGGGGGTGCATGGGCCAGAAGGATTTTCATTATAAATGCAAAATGGGACAGAAA 420  
 pkr\_rhe TGTACATCGGGGGTGCATGGGCCAGAAGGATTTTCATTATAAATGCAAAATGGGACAGAAA 420  
 pkr\_tal TGTACATCGGGGGTGCATGGGCCAGAAGGATTTTCATTATAAATGCAAAATGGGACAGAAA 420  
 pkr\_pat TGTACATCGGGGGTGCATGGGCCAGAAGGATTTTCATTATAAATGCAAAATGGGACAGAAA 420  
 pkr\_agm TGTACATCGGGGGTGCATGGGCCAGAAGGATTTTCATTATAAATGCAAAATGGGACAGAAA 420  
 pkr\_flf TGTATATCGGGGGTGCATGGGCCAGAAGGATTTTCATTATAAATGCAAAATGGGACAGAAA 420  
 pkr\_col TGTATATCGGGGGTGCATGGGCCAGAAGGATTTTCATTATAAATGCAAAATGGGACAGAAA 420  
 pkr\_woo TGTGCATCGGGGGTGAATGGGCCAGAAGGATTTTCATTATAAATGCAAAGTGGGGCAGAAA 420  
 pkr\_spi TGTGTATCAGGGATGAATGGGCCAGAAGGATTTTCATTATAAATGCAAAGTGGGGCAGAAA 420  
 pkr\_tit TGTGCATCGGGGGTGAACGGGCCAGAAGGATTTTCATTATAAATGCAAAGTGGGGCAGAAA 417  
 pkr\_owl TGTGCATCAGGGGTGAATGGGCCAGCAGGATTTTCATTATAAATGCAAAGTGGGGCAGAAA 420  
 pkr\_tam TGTGCATCGGGGGTGAATGGGCCAGAAGGATTTTCATTATAAATGCAAAGTGGGGCAGAAA 420  
 pkr\_mar TGTGCATCGGGGGTGAATGGGCCAGAAGGATTTTCATTATAAATGCAAAGTGGGGCAGAAA 420  
 \*\*\* \*\* \*\*\* \* \* \*\*\* \* \*\*\*\*\* \* \* \* \* \*

pkr\_hum GAATATAGTATTGGTACAGGTTCTACTAAACAGGAAGCAAAACAATTGGCCGCTAAACTT 480  
 pkr\_chi GAATATAGTATTGGTACAAGTTCTACTAAACAGGAAGCAAAACAATTGGCCGCTAAACTT 480  
 pkr\_bon GAATATAGTATTGGTACAAGTTCTACTAAACAGGAAGCAAAACAATTGGCCGCTAAACTT 480  
 pkr\_gor GAATATAGTATTGGTACAGGTTCTACTAAACAGGAAGCAAAACAATTGGCCGCTAAACTT 480  
 pkr\_ora GAATATAGTATTGGTACAGGTTCTACTAAACAGGAAGCAAAACAATTGGCCGCTAAACTT 480  
 pkr\_agi GAATATAGTATTGCTACAGGTTCTACTAAACAGGAAGCAAAACAATTGGCCGCTAAACTT 480  
 pkr\_wcg GAATATAGTATTGGTACAGGTTCTACTAAACAGGAAGCAAAACAATTGGCCGCTAAACTT 480  
 pkr\_isi GAATATAGTATTGCTACAGGTTCTACTAAACAGGAAGCAAAACAATTGGCCGCTAAACTT 480  
 pkr\_smg GAATATGGTATTGGTACAGGTTCTAGTAAACAGGAAGCAAAACAATTGGCCGCTAAACTT 480  
 pkr\_rhe GAATATGGTATTGGTACAGGTTCTAGTAAACAGGAAGCAAAACAGTTGGCCGCTAAACTT 480  
 pkr\_tal GAATATAGTATTGGTACAGGTTCTACTAAACAGGAAGCAAAACAATTGGCCGCTAAACTT 480  
 pkr\_pat GAATATAGTATTGGTACAGGTTCTACTAAACAGGAAGCAAAACAATTGGCCGCTAAACTT 480  
 pkr\_agm GAATATAGTATTGGTACAGGTTCTACTAAACAGGAAGCAAAACAATTGGCCGCTAAACTT 480  
 pkr\_flf GAATATAGTATTGGTACAGGTTCTACTAAACAGGAAGCAAAACAATTGGCTGCTAAATTT 480  
 pkr\_col GAATATAGTATTGGTACAGGTTCTACTAAACAGGAAGCAAAACAATTGGCCGCTAAATTT 480  
 pkr\_woo GAATATGGCATTGGTACAGGTTCTACTAAACAGGAAGCAAAACAATTGGCTGCTAAACTT 480  
 pkr\_spi GAATATGGCATTGGTACAGGTTCTACTAAACAGGAAGCAAAACAATTGGCTGCTAAACTT 480  
 pkr\_tit GAATATGGTATTGCTACAGGTTCTACTAAACAGGAAGCAAAACAGTTGGCTGCTAAACTT 477  
 pkr\_owl GAATATGGTATTGGTACAGGTTCTACTAAACAGGAAGCAAAACAATTGGCTGCTAAACTT 480  
 pkr\_tam GAATATGGTATTGGTACAGGTTCTACCAAACAGGAAGCAAAACAATTGGCTGCTAAACTT 480  
 pkr\_mar GAATATGGTATTGGTACAGGTTCTACTAAACAGGAAGCAAAACAATTGGCTGCTAAACTT 480  
 \*\*\*\*\* \* \*\*\*\* \* \* \* \* \* \* \* \* \* \* \* \* \* \* \* \* \* \* \* \* \* \*





```

pkr_hum      GCTTCTGAATCATCATCTGAAGGTGACTTCTCAGCAGATACATCAGAGATAAAATTCTAAC 654
pkr_chi      GCTTCTGAATCATCATCTGAAGGTGACTTCTCAGCAGATACATCAGAGATAAAATTCTAAC 654
pkr_bon      GCTTCTGAATCATCATCTGAAGGTGACTTCTCAGCAGATACATCAGAGATAAAATTCTAAC 654
pkr_gor      GCTTCTGAATCATCATCTGAAGGTGACTTCTCAGCAGATACATCAGAGATAAAATTCTAAC 654
pkr_ora      GGTTCGAATCATCATCTGAAAGTGACTTCTCAGCAGATACATCAGAGATAAAATTCTAAC 654
pkr_agi      GCTTCTGCATCATCATCTGAAGGTGACTTCTCAGCAGATACATCTGAGATAAAATTCTAAC 654
pkr_wcg      GCTTCTGCATCATCATCTGAAGGTGACTTCTCAGCAGATACATCAGAGATAAAATTCTAAC 654
pkr_isi      GCTTCTGCATCATCATCTGAAGGTGACTTCTCAGCAGATACATCAGAGATAAAATTCTAAC 654
pkr_smg      GCTTCTGAATCATCATCTGAAAGTGACGTCCCAGCAGATACATCAGAGATAAAATTCTAAC 651
pkr_rhe      GCTTCTGAATCATCAGCTGAAAGTGACGTCTCAGCAGATACATCAGAGATAAAATTCTAAA 651
pkr_tal      GCTTCTGAATCATCATCTGAAAATGACGTCTCAGCAGATACATCAGAGATAAAATTCTAAC 651
pkr_pat      GCTTCTGAATCATCATCTGAAAATGACGTCTCAGCAGATACATCAGAGATAAAATTCTAAC 651
pkr_agm      GCTTCTGAATCATCATCTGAAAATGACGTCTCAGCAGATACATCAGAGATAAAATTCTAAC 651
pkr_flf      GCTTCTGAATCATCATCTGAAGGTGACGTCTCAGCAGATACATCAGAGATAAAATTCTAAC 651
pkr_col      GCTTCTGATTCATCATCTGAAAGTGACGTCTCAGCAGATACATCAGAGATAAAATTCTAAC 651
pkr_woo      GCTTCTGAATCATTACCTGAAAGTGGCTTCTCAGCAGATACATCAGAGATAAAATTGTAAC 657
pkr_spi      GCTTCTGAATCATTACCTGAAAGTGGCTTCTCAGGAGATAACATCAGAGATAAAATTGTAAC 657
pkr_tit      GCTTCTGAACCAACACCTCAAAGTAGTTTCTCAGCAGATACATCAGAGATAAAATTGTAAC 654
pkr_owl      GCTTCTGAATCATCACCTGAAAGTAGTTTCTCAGCAGATACATCAGAGATAAACTTGTAAAC 660
pkr_tam      GCTTCTGAATCATCACCTGAAAGTAGTTTCTCAGCAGATACATCAGAGATAAAATTGTAAC 657
pkr_mar      GCTTCTGAATCATCACCTGAAAGTAGTTTCTCAGCAGATACATCAGAGATAAAATTTTAAAC 657
                *   *   *   *   *   *   *   *   *   *   *   *   *   *   *   *   *   *   *   *

```

```

pkr_hum      AGTGACAGTTTAAACAGT---TCTTCGTTGCTTATGAATGGTCTCAGAAATAATCAAAGG 711
pkr_chi      AGTGACAGTTTAAACAGT---TCTTCGTTGCTTATGAATGGTCTCAGAAATAATCAAAGG 711
pkr_bon      AGTGACAGTTTAAACAGT---TCTTCGTTGCTTATGAATGGTCTCAGAAATAATCAAAGG 711
pkr_gor      AGTGACAGTTTAAACAGT---TCTTCGTTGCTTATGAATGGTCTCAGAAATAATCAAAGG 711
pkr_ora      AGTGACAGTTTAAAGAAT---TCTTCGTCGCTTATGAATGGTCTCAGAAATAATCAAAGA 711
pkr_agi      AGTGACAGTTTAAACAAT---TCTTCGTTGCTTATGAATGGTCTCAGAAATAATCAAAGG 711
pkr_wcg      AGTGACAGTTTAAACAAT---TCTTCGTTGCTTATGAATGGTCTCAGAAATAATCAAAGG 711
pkr_isi      AGTGACAGTTTAAACAAT---TCTTCGTTGCTTATGAATGGTCTCAGAAATAATCAAAGG 711
pkr_smg      AGTAGCAGTTTACACATT---TCTTCATTGTTTACGAATGGTCTCAGAAATAACCAAAGG 708
pkr_rhe      AGTGGCAGTTTACACATT---TCTTCATTGTTTACGAATGGTCTCAGAAATAACCAAAGG 708
pkr_tal      AGTGGCAGTTTAAACAAT---TCTTCATTGTTTACGAATGGTCTCAGAAATAACCAAAGG 708
pkr_pat      AGTGGCAGTTTAAACAAG---TCTTCATTGTTTACGAATGGTCTCAGAAATAACCAAAGG 708
pkr_agm      AGTGGCAGTTTAAACAAG---TCTTCATTGTTTACGAATGGTCTCAGAAATAACCAAAGG 708
pkr_flf      AGTGGCAGTTTAAACAAT---TCTTCATTGTTTACGAATGGTCTCAGAAATAACCAAAGG 708
pkr_col      AGTGGCAGTTTAAACAAT---TCTTCATTGTTTACGAATGGTCTCAGAAATAACCAAAGG 708
pkr_woo      AAC---AGTTTAAACAATGTTCTTCATTGTTCTATGAATGGTCTCAGAAATAATCAAAGG 714
pkr_spi      AAC---AGTTTAAACAGTTGTTCTTCATTGTTCTATGAATGGTCTCAGAAATAATCAAAGG 714
pkr_tit      AAT---AGTTTAAACAATGTTCTTCATTGTTCTATGAATGGTCTCAGAAATAATCAAAGG 711
pkr_owl      AAT---AGTTTAAACAATGTTCTTCATTGTTCTATGAATGGTCTCAGAAATAATCAAAGG 717
pkr_tam      AAT---GGTTTGAATAACTGTTCTTCATTGTTCTACGAATGGTCTCAGAAATAATCAAAGG 714
pkr_mar      AAT---AGTTTAAACAATGTTCTTCATTGTTCTATGAATGGTCTCAGAAATAATCAAAGG 714
                *           *   *   *   *   *   *   *   *   *   *   *   *   *   *

```



pkr\_hum TTTGGCCAAGTTTTCAAAGCAAAAACACAGAATTGACGGAAAAGACTTACGTTATTTAAACGT 891  
 pkr\_chi TTTGGCCAAGTTTTCAAAGCAAAAACACAGAATTGACGGAAAAGACTTACGTTATTTAAACGT 891  
 pkr\_bon TTTGGCCAAGTTTTCAAAGCAAAAACACAGAATTGACGGAAAAGACTTACGTTATTTAAACGT 891  
 pkr\_gor TTTGGCCAAGTTTTCAAAGCAAAAACACAGAATTGACGGAAAAGACTTACGTTATTTAAACGT 891  
 pkr\_ora TTTGGCCAAGTTTTCAAAGCAAAAACACAGAATTGACGGAAAAGACTTACGTTATTTAAACGT 891  
 pkr\_agi TTTGGCCAAGTTTTCAAAGCAGAACACAGAATTGACAGAAAAGACTTACGTTATTTAAACGT 891  
 pkr\_wcg TTTGGCCAAGTTTTCAAAGCAGAACACAGAATTGACAGAAAAGACTTACGTTATTTAAACGT 891  
 pkr\_isi TTTGGCCAAGTTTTCAAAGCAGAACACAGAATTGACAGAAAAGACTTACGTTATTTAAACGT 891  
 pkr\_smg TTTGGCCAAGTTTTCAAAGCAAAAACACAGAATTGACGGAAAAGACTTACGTTATTTAAACGT 888  
 pkr\_rhe TTTGGCCAAGTTTTCAAAGCAAAAACACAGAATTGACGGAAAAGACTTACGTTATTTAAACGT 888  
 pkr\_tal TTTGGCCAAGTTTTCAAAGCAAAAACACAGAATTGACGGAAAAGACTTACGTTATTTAAACGT 888  
 pkr\_pat TTTGGCCAAGTTTTCAAAGCAAAAACACAGAATTGACGGAAAAGACTTACGTTATTTAAACGT 888  
 pkr\_agm TTTGGCCAAGTTTTCAAAGCAAAAACACAGAATTGACGGAAAAGACTTACGTTATTTAAACGT 888  
 pkr\_flf TTTGGCCAAGTTTTCAAAGCAAAAACACAGAATTGACGGAAAAGACTTACGTTATTTAAACGT 888  
 pkr\_col TTTGGCCAAGTTTTCAAAGCAAAAACACAGAATTGACGGAAAAGACTTACGTTATTTAAACGT 888  
 pkr\_woo TTTGGCCAAGTTTTCAAAGCAAAAACACAGAATTGACGGAAAAGACTTATGTTATTTAAACGT 894  
 pkr\_spi TTTGGCCAAGTTTTCAAAGCAAAAACACAGAATTGACGGAAAAGACTTATGTTATTTAAACGT 894  
 pkr\_tit TTTGGCCAAGTTTTCAAAGCAAAAACACAGAATTGACGGAAAAGACTTACGTTATTTAAACGT 891  
 pkr\_owl TTTGGCCAAGTTTTCAAAGCAAAAACACAGAATTGACAGAAAAGACTTACGTTATTTAAACGT 897  
 pkr\_tam TTTGGCCAAGTTTTCAAAGCAAAAACACAGAATTGACGGAAAAGACTTACGTTATTTAAACGT 894  
 pkr\_mar TTTGGCCAAGTTTTCAAAGCAAAAACACAGAATTGATGAAAAGACTTACGTTATTTAAACGT 894  
 \*\*\*\*\* \*\*

pkr\_hum GTTAAATATAATAACGAGAAGGCGGAGCGTGAAGTAAAAGCATTGGCAAAACTTGATCAT 951  
 pkr\_chi GTTAAATATAATAACGAGAAGGCGGAGCGTGAAGTAAAAGCATTGGCAAAACTTGATCAT 951  
 pkr\_bon GTTAAATATAATAACGAGAAGGCGGAGCGTGAAGTAAAAGCATTGGCAAAACTTGATCAT 951  
 pkr\_gor GTTAAATATAATAACGAGAAGGCGGAGCGTGAAGTAAAAGCATTGGCAAAACTTGATCAT 951  
 pkr\_ora GTTAAATATAATAACGAGAAGGCGGAGCGTGAAGTAAAAGCATTGGCAAAACTTAAATCAT 951  
 pkr\_agi GTTAAATATAATAGCGAGAGGGTGGAGCGTGAAGTAAAAGCATTGGCAAAACTTGATCAT 951  
 pkr\_wcg GTTAAATATAATAGCGAGAAGGTGGAGCGTGAAGTAAAAGCATTGGCAAAACTTGATCAT 951  
 pkr\_isi GTTAAATATAATAGCGAGAAGGTGGAGCGTGAAGTAAAAGCATTGGCAAAACTTGATCAT 951  
 pkr\_smg GTTAAATATAATAGCAAGAAGGCAGAGCGTGAAGTAAAAGCATTGGCAAAACTTGATCAT 948  
 pkr\_rhe GTTAAATATAATAGCAAGAAGGCAGAGCGTGAAGTAAAAGCATTGGCAAAACTTGATCAT 948  
 pkr\_tal GTTAAATATAATAGCAAGAAGGCAGAGCGTGAAGTAAAAGCATTGGCAGAACTTGATCAT 948  
 pkr\_pat GTTAAATATAATAGCAAGAAGGCAGAGCGTGAAGTAAAAGCATTGGCAGAACTTGATCAT 948  
 pkr\_agm GTTAAATATAATAGCAAGAAGGCAGAGCGTGAAGTAAAAGCATTGGCAGAACTTGATCAT 948  
 pkr\_flf GTTAAATATAATGGCGAGAAGGCAGAGCGTGAAGTAAAAGCATTGGCAAAACTTGATCAT 948  
 pkr\_col GTTAAATATAATGGCGAGAAGGCAGAGCGTGAAGTAAAAGCATTGGCAAAACTTGATCAT 948  
 pkr\_woo GTTAAATATAATAGCGACAAGGCAGAGCGTGAAGTAAAAGCATTGGCAGAACTTGATCAT 954  
 pkr\_spi GTTAAATATAATAGCGACAAGGCAGAGCGTGAAGTAAAAGCATTGGCAGAACTTGATCAT 954  
 pkr\_tit GTTAAATATAATAGCGACAAGGCAGAGCGTGAAGTAAAAGCATTGGCAGAACTTGATCAT 951  
 pkr\_owl GTTAAATATAATAGCAACAAGGTGGAGCGTGAAGTAAAAGCATTGGCAGAACTTGATCAT 957  
 pkr\_tam GTTAAATATAATAGCGACAAGGCAGAGCGTGAAGTAAAAGCATTGGCAGAACTTGATCAT 954  
 pkr\_mar GTTAAATATAATAGCGACAAGGCAGAGCGTGAAGTAAAAGCATTGGCAGAACTTGATCAT 954  
 \*\*\*\*\* \* \* \* \*

pkr\_hum GTAAATATTGTTCACTACAATGGCTGTTGGGATGGATTTGATTATGATCCTGAGACCAGT 1011  
 pkr\_chi GTAAATATTGTTCACTACAATGGCTGTTGGGATGGATTTGATTATGATCCTGAGACCAGT 1011  
 pkr\_bon GTAAATATTGTTCACTACAATGGCTGTTGGGATGGATTTGATTATGATCCTGAGACCAGT 1011  
 pkr\_gor GTAAATATTGTTCACTACAATGGCTGTTGGGATGGAGTTGATTATGATCCTGAGACCAGT 1011  
 pkr\_ora GTAAATATTGTTTCGCTACAATGGCTGTTGGGATGGAATTGATTATGATCCTGAGACCAGT 1011  
 pkr\_agi GTAAATATTGTTAAGTACAATGGCTGTTGGGATGGATTTGATTATGATCCTGAGACCAGT 1011  
 pkr\_wcg GTAAATATTGTTAAGTACAATGGCTGTTGGGATGGATTTGATTATGATCCTGAGACCAGT 1011  
 pkr\_isi GTAAATATTGTTAAGTACAATGGCTGTTGGGATGGATTTGATTATGATCCTGAGACCAGT 1011  
 pkr\_smg GTAAATATTGTTCACTACCATGGCTGTTGGGATGGACTTGATTATGATCCTGAGATCAGT 1008  
 pkr\_rhe GTAAATATTGTTCACTACAATGGCTGTTGGGATGGACTTGATTATGATCCTGAGATCAGT 1008  
 pkr\_tal GTAAATATTGTTCACTACAATGGCTGTTGGGATGGACTTGATTATGATCCTGAGATCAGT 1008  
 pkr\_pat GTAAATATTGTTCACTACAATGGCTGTTGGGATGGACTTGATTATGATCCTGAGATCAGT 1008  
 pkr\_agm GTAAATATTGTTCACTACAATGGCTGTTGGGATGGACTTGATTATGATCCTGAGATCAGT 1008  
 pkr\_flf GTAAATATTGTTCACTACAATGGCTGTTGGGATGGACTTGATTATGATCCTGAGATCAGT 1008  
 pkr\_col GTAAATATTGTTCACTACAATGGCTGTTGGGATGGACTTGATTATGATCCTGAGATCAGT 1008  
 pkr\_woo GTAAATATTGTTCACTACAATGGCTGTTGGGATGGATTTGATTATGATCCTGAGAGTGAT 1014  
 pkr\_spi GTAAATATTGTTCACTACAATGGCTGTTGGGATGGATTTGATTATGATCCTGAGAGTGAT 1014  
 pkr\_tit GTAAATATTGTTCACTACAATGGCTGTTGGGATGGAATTGATTATGATCCTGAGAGCAGT 1011  
 pkr\_owl GTAAATATTGTTCACTACAAAGGCTGTTGGGATGGATTTGATTATGATCCTGAGAACAGT 1017  
 pkr\_tam GTAAATATCGTTCACTACAATGGCTGTTGGGATGGATTTGATTATGATCCTGAGAGCGGT 1014  
 pkr\_mar GTAAATATTGTTCACTACAACGGCTGTTGGGATGGATTTGATTATGATCCTGAGAGCAGT 1014

\*\*\*\*\* \*\* \* \*\*\*\*\* \* \*\*\*\*\* \* \*\*\*\*\* \* \*\*\*\*\* \* \*\*\*\*\* \*

pkr\_hum GATGATTCCTTGAGAGCAGTGATTATGATCCTGAGAACAGCAAAAATAGTTCAAGG--- 1067  
 pkr\_chi GATGATGATCCTTGAGAGCAGTGATTATGATCCTGAGAACAGCAAAAATAGTTCAAGG--- 1067  
 pkr\_bon GATGATGATCCTTGAGAGCAGTGATTATGATCCTGAGAACAGCAAAAATAGTTCAAGG--- 1067  
 pkr\_gor GATGATTATCCTTGAGAGCAGTGATTATGATCCTGAGAACAGCAAAAATAGTTCAAGG--- 1067  
 pkr\_ora GCTTATGATCCTTGAGAGCAGTGATTATGATCCTGAGAACAGCAAAAATAGTTCAAGG--- 1067  
 pkr\_agi TCTTATGATCCTTGAGAGCAGTGATTATGATCCTGAGAACAGCAAAAATAGTTCAAGG--- 1067  
 pkr\_wcg TCTTATGATCCTTGAGAGTGATGATTATGATCCTGAGAACAGCAAAAATAGTTCAAGG--- 1067  
 pkr\_isi TCTTATGATCCTTGAGAGCGATGATTATGATCCTGAGAACAGCAAAAATAGTTCAAGG--- 1067  
 pkr\_smg GCTTATGATCCTTGAGAGCTCTGATTTGGATCCTGAGAGCCAAAAAATAGTTTAAAGGAAT 1068  
 pkr\_rhe GCTTATGAGCCTTGAGAGCCTGATTTTGGATCCTGAGAACCAAAAAAATAGTTTAAAGGAAT 1068  
 pkr\_tal GCTTATGATCCTTGAGAGCCCTGATTTTGGATCCTGAGAACCAAAAAAATAGTTTAAAGGAAT 1064  
 pkr\_pat GCTTATGATCCTTGAGAGCCCTGATTTTGGATCCTGAGAACCAAAAAAATAGTTTAAAGGAAT 1064  
 pkr\_agm GCTTATGATCCTTGAGAGCCCTGATTTTGGATCCTGAGAACCAAAAAAATAGTTTAAAGGAAT 1064  
 pkr\_flf GCTTATGATGCTTGAGAGCCCTGATTATGATCCTGAGAACATCAAAAATAGTTTAAAGGAAT 1064  
 pkr\_col GCTTATGATCCTTGAGAGCCCTGATTATGATCCTGAGAACAGCAAAAATAGTTTAAAGGAAT 1064  
 pkr\_woo GATTATGATCCTTGAGAGCAGTGATTATGATCCTGAGAACAGCAAAAATAATTCAAGA--- 1070  
 pkr\_spi GATTATGATCCTTGAGAGCAGTGATTATGATCCTGAGAACAGCAAAAATAATTCAAGA--- 1070  
 pkr\_tit AATTATGATCCTTGAGAGCAATGATTATGATCCTGAGAACAGCAAAAATAATTCAAGA--- 1073  
 pkr\_owl GATTATGATCCTTGAGAGCAGTGATTATGATCCTGAGAACAGCAAAAATAATTCAAGA--- 1070  
 pkr\_tam GATTATGATCCTTGAGAGCGGTGATTATGATCCTGAGAACAGCAAAAATAATTCAAGA--- 1070  
 pkr\_mar \* \*\* \*\*\*\*\* \*\*\*\*\* \*\*\*\*\* \* \*\*\*\*\* \*\* \*\*\*

```

pk_r_hum -----TCAAAGACTAAGTGCCTTTTCATCCAAATGGAATTCTGTGATAAAGGG 1116
pk_r_chi -----TCAAAGACTAAGTGCCTTTTCATCCAAATGGAATTCTGTGATAAAGGG 1116
pk_r_bon -----TCAAAGACTAAGTGCCTTTTCATCCAAATGGAATTCTGTGATAAAGGG 1116
pk_r_gor -----TCAAAGACTAAGTGCCTTTTCATCCAAATGGAATTCTGTGATAAAGGG 1116
pk_r_ora -----TCAAAGACTAAGTGCCTTTTCATCCAAATGGAATTCTGTGATAAAGGG 1116
pk_r_agi -----TCAAAGACTAAGTGCCTTTTCATCCAAATGGAATTCTGTGATAAAGGG 1116
pk_r_wcg -----TCAAAGACTAAGTGCCTTTTCATCCAAATGGAATTCTGTGATAAAGGG 1116
pk_r_isi -----TCAAAGACTAAGTGCCTTTTCATCCAAATGGAATTCTGTGATAAAGGG 1116
pk_r_smg TTTTATACCCAGATCAAAGACTAAGTGCCTTTTCATCCAAATGGAATTCTGTGAAGAAGGG 1128
pk_r_rhe TTTTATACCCAGATCAAAGACTAAGTGCCTTTTCATCCAAATGGAATTCTGTGAAGACGGG 1128
pk_r_tal -----TCAAAGACTAAGTGCCTTTTCATCCAAATGGAATTCTGTGAAAAAGGG 1113
pk_r_pat -----TCAAAGACTAAGTGCCTTTTCATCCAAATGGAATTCTGTGAAAAAGGG 1113
pk_r_agm -----TCAAAGACTAAGTGCCTTTTCATCCAAATGGAATTCTGTGAAAAAGGG 1113
pk_r_flf -----TCAAAGACTAAGTGCCTTTTCATCCAAATGGAATTCTGTGAAAAAGGG 1113
pk_r_col -----TCAAAGACTAAGTGCCTTTTCATCCAAATGGAATTCTGTGAAAAAGGG 1113
pk_r_woo -----TCAAAGACTAAGTGCCTTTTCATCCAAATGGAATTCTGTGATAAAGGG 1119
pk_r_spi -----TCAAAGACTAAGTGCCTTTTCATCCAAATGGAATTCTGTGATAAAGGG 1119
pk_r_tit -----TCAAAGACTAAGTGCCTTTTCATCCAAATGGAATTCTGTGATAAAGGG 1116
pk_r_owl -----TCAAAGACTAAGTGCCTTTTCATCCAAATGGAATTCTGTGATAAAGGG 1122
pk_r_tam -----TCAAAGACTAAGTGCCTTTTCATCCAAATGGAATTCTGTGATAAAGGG 1119
pk_r_mar -----TCAAAGACTAAGTGCCTTTTCATCCAAATGGAATTCTGTGATAAAGGG 1119
* * * * *

```

```

pk_r_hum ACCTTGGAACAATGGATTGAAAAAAGAAGAGGCGAGAAACTAGACAAAGTTTTGGCTTTG 1176
pk_r_chi ACATTGGAGCAATGGATTGAAGATAGAAGAGGCAAGAAACTAGACAAAGTTTTGGCTTTG 1176
pk_r_bon ACATTGGAGCAATGGATTGAAGATAGAAGAGGCAAGAAACTAGACAAAGTTTTGGCTTTG 1176
pk_r_gor ACATTGGAGCAATGGATTGAAAAAAGAAGAGGCGAGAAACTAGACAAAGTTTTGGCTTTG 1176
pk_r_ora ACATTGGAGCAATGGATTGATAATACAAGAGGCAAGAAACTAGACAAAGTTTTGGCTTTG 1176
pk_r_agi ACATTGGAGCAATGGATTGACAATAGAAGAGGCAAGAACTAGACAAAGTTTTGGCTTTG 1176
pk_r_wcg ACATTGGAGCAATGGATTGACAATAGAAGAGGCAAGAAACTAGACAAAGTTTTGGCTTTG 1176
pk_r_isi ACATTGGAGCAATGGATTGACAATAGAAGAGGCAAGAAACTAGACAAAGTTTTGGCTTTG 1176
pk_r_smg ACATTGGAGAAATGGCTTGAAGATAGAAGAGGCAAGAAACTAGACAAAGTTTTGGCTTTG 1188
pk_r_rhe ACATTGGAGGACTGGCTTGATCGTAGAAAAGGCAAGAACTAGACAAAGTTTTGGCTTTG 1188
pk_r_tal ACATTGGAGGAATGGATTGAAGATAGAAGAGGCAAGAAACTAGACAAAGTTTTGGCTTTG 1173
pk_r_pat ACATTGGAGGAATGGATTGAAGATAGAAGAGGCAAGAAACTAGACAAAGTTTTGGCTTTG 1173
pk_r_agm ACATTGGAGGAATGGATTGAAGATAGAAGAGGCAAGAAACTAGACAAAGTTTTGGCTTTG 1173
pk_r_flf ACATTGGAGCAATGGATTGAAAAAAGAAGAGGCGAGAAACTAGACAAAGTTTTGGCTTTG 1173
pk_r_col ACATTGGAGGAATGGATTGAAGATAGAAGAGGCAAGAAACTAGACAAAGTTTTGGCTTTG 1173
pk_r_woo ACATTGGAGCAATGGATTGAAGACAGAAGAGGCAAGAAACTAGACAAAGTTTTGTCTTTG 1179
pk_r_spi ACATTGGAGCAATGGATTGAAGACAGAAGAGGCAAGAAACTAGACAAATTTTTGTCTTTG 1179
pk_r_tit ACATTGGAGCAATGGATTGAAGACAGAAGAGGCAAGAAACTAGACAAAGTTTTGTCTCTG 1176
pk_r_owl ACATTGGAGCAATGGATTGACGACAGAAGAGGCAAGAACTAGACAAAGTTTTGTCTTTG 1182
pk_r_tam ACATTGGAGCAATGGATTGAAGACAGAAGAGGCAAGAAACTAGACAAAGTTTTGTCTTTG 1179
pk_r_mar AACTGGAGCAATGGATTGAAGACAGAAGAGGCAAGAAACTAGACAAAGTTTTGTCTTTG 1179
** * * * * *

```

pkr\_hum GAACTCTTTGAACAAATAACAAAAGGGGTGGATTATATACATTCAAAAAATTAATTCAT 1236  
 pkr\_chi GAACTCTTTGAACAAATAACAAAAGGGGTGGATTATATACATTCAAAAAATTAATTCAT 1236  
 pkr\_bon GAACTCTTTGAACAAATAACAAAAGGGGTGGATTATATACATTCAAAAAATTAATTCAT 1236  
 pkr\_gor GAACTCTTTGAACAAATAACAAAAGGGGTGGATTATATACATTCAAAAAATTAATTCAT 1236  
 pkr\_ora GAACTCTTTGAACAAATAACAAAAGGGGTGGATTATATACATTCAAAAAATTAATTCAC 1236  
 pkr\_agi GAATTCCTTTGAACAAATAACAAAAGGAGTGGATTATATACATTCAAAAAATTAATTCAT 1236  
 pkr\_wcg GAATTCCTTTGAACAAATAACAAAAGGGGTGGATTATATACATTCAAAAAATTAATTCAT 1236  
 pkr\_isi GAATTCCTTTGAACAAATAACAAAAGGGGTGGATTATATACATTCAAAAAATTAATTCAT 1236  
 pkr\_smg GAACTCTTTGAACAAATAACAAAAGGGTGGATTATATACATTCAAAAAATATAATTCAT 1248  
 pkr\_rhe GAACTCTTTGAACAAATAACAAAAGGGTGGATTATATACATTCAAAAAATATAATTCAT 1248  
 pkr\_tal GAACTCTTTGAACAAATAACAAAAGGATTGGATTATATACATTCAAAAAATATAATTCAT 1233  
 pkr\_pat GAACTCTTTGAACAAATAACAAAAGGGTGGATTATATACATTCAAAAAATATAATTCAT 1233  
 pkr\_agm GAACTCTTTGAACAAATAACAAAAGGGTGGATTATATACATTCAAAAAATATAATTCAT 1233  
 pkr\_flf GAACTCTTTGAACAAATAACAAAAGGGTTCGATTATATACATTCAAAAAATATAATTCAT 1233  
 pkr\_col GAACTCTTTGAACAAATAACAAAAGGGGTGGATTATATACATTCAAAAAATATAATTCAT 1233  
 pkr\_woo GAATTCCTTTGAACAAATAACAACAGGGGTAGATTATATACATTCAAAAAATTAATTCAT 1239  
 pkr\_spi GAATTCCTTTGAACAAATAACAACAGGGGTAGATTATATACATTCAAAAAATTAATTCAT 1239  
 pkr\_tit GAATTCCTTTGAACAAATAACAACAGGGGTAGATTATATACATTCAAAAAATTAATTCAT 1236  
 pkr\_owl GAATTCCTTTGAACAAATAACAACAGGGGTAGATTATATACATTCAAAAAATTAATTCAT 1242  
 pkr\_tam GAATTCCTTTGAACAAATAACAACAGGGGTAGATTATATACATTCAAAAAATTAATTCAT 1239  
 pkr\_mar GAATTCCTTTGAACAAATAACAACAGGGGTAGATTATATACATTCAAAAAATTAATTCAT 1239  
 \*\*\* \*\*\*\*\* \* \*\*\*\*\*

pkr\_hum AGAGATCTTAAGCCAAGTAATATATTCTTAGTAGATACAAAACAAGTAAAGATTGGAGAC 1296  
 pkr\_chi AGAGATCTTAAGCCAAGTAATATATTCTTAGTAGATACAAAACAAGTAAAGATTGGAGAC 1296  
 pkr\_bon AGAGATCTTAAGCCAAGTAATATATTCTTAGTAGATACAAAACAAGTAAAGATTGGAGAC 1296  
 pkr\_gor AGAGATCTTAAGCCAAGTAATATATTCTTAGTAGATACAAAACAAGTAAAGATTGGAGAC 1296  
 pkr\_ora AGAGATCTTAAGCCAAGTAATATATTCTTAGTAGATACAAAACAAGTAAAGATTGGAGAC 1296  
 pkr\_agi AGAGATCTTAAGCCAAGTAATATATTCTTAGTAGATACAAAACAAGTAAAGATTGGAGAC 1296  
 pkr\_wcg AGAGATCTTAAGCCAAGTAATATATTCTTAGTAGATACAAAACAATAAAGATTGGAGAC 1296  
 pkr\_isi AGAGATCTTAAGCCAAGTAATATATTCTTAGTAGATACAAAACAATAAAGATTGGAGAC 1296  
 pkr\_smg AGAGATCTTAAGCCAAGTAATATATTCTTAGTAGATACAAACCAATAAAGATTGGAGAC 1308  
 pkr\_rhe AGAGATCTTAAGCCAAGTAATATATTCTTAGTAGATACAAAACAATAAAGATTGGAGAC 1308  
 pkr\_tal AGAGATCTTAAGCCGAGTAATATATTCTTAGTAGATACAAAACAATAAAGATTGGAGAC 1293  
 pkr\_pat AGAGATCTTAAGCCAAGTAATATATTCTTAGTAGATACAAAACAATAAAGATTGGAGAC 1293  
 pkr\_agm AGAGATCTTAAGCCAAGTAATATATTCTTAGTAGATACAAAACAATAAAGATTGGAGAC 1293  
 pkr\_flf AGAGATCTTAAGCCAAGTAATATATTCTTAGTAGATACAAAACAATAAAGATTGGAGAC 1293  
 pkr\_col AGAGATCTTAAGCCAAGTAATATATTCTTAGTAGATACAAAACAATAAAGATTGGAGAC 1293  
 pkr\_woo AGAGATCTTAAGCCAAGTAATATATTCTTAGTAGATACAAAACAATAAAGATTGGAGAC 1299  
 pkr\_spi AGAGATCTTAAGCCAAGTAATATATTCTTAGTAGATACAAAACAATAAAGATTGGAGAC 1299  
 pkr\_tit AGAGATCTTAAGCCAAGTAATATATTCTTAGTAGATACAAAACAATAAAGATTGGAGAC 1296  
 pkr\_owl AGAGATCTTAAGCCAAGTAATATATTCTTAGTAGATATAAAAACAATAAAGATTGGAGAC 1302  
 pkr\_tam AGAGATCTTAAGCCAAGTAATATATTCTTAGTAGATACAAAACAATAAAGATTGGAGAC 1299  
 pkr\_mar AGAGATCTTAAGCCAAGTAATATATTCTTAGTAGATACAAAACAATAAAGATTGGAGAC 1299  
 \*\*\*\*\*



```

pkr_hum      GCTTTGGGGCTAATTCTTGCTGAACTTCTTCATGTATGTGACACTGCTTTTGAAACATCA 1476
pkr_chi      GCTTTGGGGCTAATTCTTGCTGAACTTCTTCATGTATGTGACACTGCTTTTGAAACATCA 1476
pkr_bon      GCTTTGGGGCTAATTCTTGCTGAACTTCTTCATGTATGTGACACTGCTTTTGAAACATCA 1476
pkr_gor      GCTTTGGGGCTAATTCTTGCTGAACTTCTTCATGTATGTGACACTGCTTTTGAAACATCA 1476
pkr_ora      GCTTTGGGGCTAATTCTTGCTGAACTTCTTCATGTATGTGATACTGCTTCTGAAACAGCA 1476
pkr_agi      GCTTTGGGGCTAATTCTTGCTGAACTTCTTCACGTATGTGACACTGCTTCTGAAACAGCA 1476
pkr_wcg      GCTTTGGGGCTAATTCTTGCTGAACTTCTTCATGTATGTGACACTGCTTATGAAACAGCA 1476
pkr_isi      GCTTTGGGGCTAATTCTTGCTGAACTTCTTCATGTATGTGACACTGCTTATGAAACAGCA 1476
pkr_smg      GCTTTGGGGCTAATTCTTGCTGAACTTCTTTATGTATGTGACACTGCTTCCGAAACATCA 1488
pkr_rhe      GCTTTGGGGCTAATTCTTGCTGAACTTCTTTATGTATGTGACACTGCTTCCGAAACATTA 1488
pkr_tal      GCTTTGGGGCTAATTCTTGCTGAACTTCTTCATGTATGTGACACTGCTTCCGAAACATCA 1473
pkr_pat      GCTTTGGGGCTAATTCTTGCTGAACTTCTTCATGTATGTGACACTGCTTCCGAAACATCA 1473
pkr_agm      GCTTTGGGGCTAATTCTTGCTGAACTTCTTCATGTATGTGACACTGCTTCCGAAACATCA 1473
pkr_flf      GCTTTGGGGCTAATTCTTGCTGAACTTCTTCATGTATGTGACACTGCTTTCCGAAACATCA 1473
pkr_col      GCTTTGGGGCTAATTCTTGCTGAACTTCTTCATGTATGTGACACTGCTTTCCGAAACATCA 1473
pkr_woo      GCTTTGGGGCTAATTTTTGCGGAACCTTCTTCATGTATGTGACACTGCTTTGGAAACATCA 1479
pkr_spi      GCTTTGGGGCTAATTTTTGCTGAACTTCTTCATGTATGTGACACTGCTTTGGAAACATCA 1479
pkr_tit      GCTTTGGGGCTAATTTTTGCGGAACCTTCTTCATGTATGTGACACTGCTTCCGAAACATCA 1476
pkr_owl      GCTTTGGGGCTAATTTTTGCTGAACTTCTTCATGTATGTAACACTGCTTTGGAAACATCA 1482
pkr_tam      GCTTTGGGGCTAATTTTTGCTGAACTTCTTCATGTATGTGACACTGCTTTGGAAACATCA 1479
pkr_mar      GCTTTGGGGCTAATTTTTGCTGAACTTCTTCATGTATGTGACACTGCTTTGGAAACATCA 1479
***** * * * * * * * * * * * * * * * * * * * * * * * * * * * * * * * * * * *

```

```

pkr_hum      AAGTTTTTCACAGACCTACGGGATGGCATCATCTCAGATATA---TTTGATAAAAAAGAA 1533
pkr_chi      AAGTTTTTCACAGACCTACGGGATGGCATCATCTCAGATATATTATTTGATAAAAAAGAA 1536
pkr_bon      AAGTTTTTCACAGACCTACGGGATGGCATCATCTCAGATATATTATTTGATAAAAAAGAA 1536
pkr_gor      AAGTTTTTCACAGACCTACGGGATGGCATCATCTCAGATATA---TTTGATAAAAAAGAA 1533
pkr_ora      AAGTTTTTCAAAGACCTACGGGATGGCATCATCTCAGATATA---TTTGATAAAAAAGAA 1533
pkr_agi      AAGTTTTTCACAGACCTACGGGATGGCATCATCTCAGATGTA---TTTGATAAAAAAGAA 1533
pkr_wcg      AAGTTTTTCACAGACCTACGGGATGGCATCATCTCAGATGTA---TTTGATAAAAAAGAA 1533
pkr_isi      AAGTTTTTCACAGACCTACGGGATGGCATCATCTCAGATGTA---TTTGATAAAAAAGAA 1533
pkr_smg      AAGCTTTTTCAAGACCTACGAGGTGGCATCATCTCAGATGTG---TTTGATAAAAGAGAA 1545
pkr_rhe      CAGCTTTTTCGAGACCTACGGGATGGCACCATCTCAGATGTG---TATGATAAAAGAGAA 1545
pkr_tal      AAGTTTTTCAAAGACCTACGGGATGGCACCATCTCAGATGTG---TTTGATAAAAGAGAA 1530
pkr_pat      AAGTTTTTCAAAGACCTACGGGATGGCACCATCTCAGATGTG---TTTGATAAAAGAGAA 1530
pkr_agm      AAGTTTTTCAAAGACCTACGGGATGGCACCATCTCAGATGTG---TTTGATAAAAGAGAA 1530
pkr_flf      GAGTTTTTCAAAGACCTACGGGATGGCGTCATCTCAGATGTG---TTTGATAAAAGAGAA 1530
pkr_col      GAGTTTTTCAAAGACCTACGGGATGGCGTCATCTCAGATGTG---TTTGATAAAAGAGAA 1530
pkr_woo      AAGTTTTTCAGAGACCTACGGGATGGCATCATCTCAGATATG---TTTGATAAACGAGAA 1536
pkr_spi      AAGTTTTTCACAGACCTACGGGATGGCATCATCTCAGATATG---TTTGATAAACGAGAA 1536
pkr_tit      AAGTTTTTCAGAGACCTACGGAATGGCATCATCTCAGATATG---TTTGATAACAAGAA 1533
pkr_owl      AAGTTTTTCGGAGACCTACGGAATGGTATCACCTCAGATATG---TTTGATAAACGAGAA 1539
pkr_tam      AAGTTTTTCACAGACCTACGGGATGGCATCATCTCAAATATG---TTTGATAAACGAGAA 1536
pkr_mar      AAGTTTTTCACAGACCTACGGGATGGCGTCATCTCAGATACG---TTTGACAAACGAGAA 1536
* * * * * * * * * * * * * * * * * * * * * * * * * * * * * * * * * * *

```



pkr\_hum AAAACTCTTCTACAGAAATTACTCTCAAAGAAAACCTGAGGATCGACCTAACACATCTGAA 1593  
 pkr\_chi AAAACTCTTCTACAGAAATTACTCTCAAAGAAAACCTGAGGATCGACCTAACACATCTGAA 1596  
 pkr\_bon AAAACTCTTCTACAGAAATTACTCTCAAAGAAAACCTGAGGATCGACCTAACACATCTGAA 1596  
 pkr\_gor AAAACCTTCTACAGAAATTACTGTCAAAGAAAACCTGAGGATCGACCTAACACATCTGAA 1593  
 pkr\_ora AAAACTCTTCTACAGAAATTACTCTCAAAGAAAACCTGAGGACCGACCTAACACATCTGAA 1593  
 pkr\_agi AAAACTCTTCTACAGAAATTACTCTCAAAGAAAACCTGAGGACCGACCTAACACATCTGAA 1593  
 pkr\_wcg AAAACTCTTCTACAGAAATTACTCTCAAAGAAAACCTGAGGACCGACCTAACACATCTGAA 1593  
 pkr\_isi AAAACTCTTCTGCAGAAATTACTCTCAAAGAAAACCTGAGGACCGACCTAACACATCTGAA 1593  
 pkr\_smg AAATCTCTTCTAGAGAAATTACTCTCAAAGAGACCTGAGGACCGACCTAACACATCTGAA 1605  
 pkr\_rhe AAAACTCTTCTAAAGAAATTACTCTCAAAGAAAACCTGAGGACCGACCTAACACATCTGAA 1605  
 pkr\_tal AAAACTCTTCTAGAGAAATTACTCTCAAAGAAAACCTGAGGACCGACCTAACACATCTGAA 1590  
 pkr\_pat AAAACTCTTCTAGAGAAATTACTCTCAAAGAAAACCTGAGGACCGACCTAACACATCTGAA 1590  
 pkr\_agm AAAACTCTTCTAGAGAAATTACTCTCAAAGAAAACCTGAGGACCGACCTAACACATCTGAA 1590  
 pkr\_flg AAAACTCTTCTAGAGAAATTACTCTCAAAGAAAACCTGAGGACCGACCTAACACATCTGAA 1590  
 pkr\_col AAAACTCTTCTAGAGAAATTACTCTCAAAGAAAACCTGAGGACCGACCTAACACATCTGAA 1590  
 pkr\_woo AAAACTCTTCTACGAAAATTACTCTCAAAGAAAACCTGAGGACCGCCCTAACACATCTGAA 1596  
 pkr\_spi AAAACTCTTCTACGGAGATTACTCTCAAAGAAAACCTGAGAACC GCCCTGACACATCTGAA 1596  
 pkr\_tit AAAACTCTTCTACGAAAATTACTCTCAAAGAAAACCTGGGGAACGCCCTAACACATCTGAA 1593  
 pkr\_owl AAAACTCTTCTACGAAAATTACTCTCAGAGAAAACCTGAGGACCGACCTAACACATCTGAA 1599  
 pkr\_tam AAAACTCTTCTACGAAAATTACTCTCAAAGAAAACCTGAGGACCGACCCAACACATCTGAA 1596  
 pkr\_mar AAAACTCTTCTACGAAAATTACTCTCAAAGAAAACCTGAGGACCGACCTAACACATCTGAA 1596  
 \*\*\* \* \*\*\*\*\* \*\* \*\*\*\*\* \*\*\* \*\* \*\*\*\*\* \* \* \*\* \* \*\*\*\*\*

pkr\_hum ATACTAAGGACCTTGACTGTGTGGAAGAAAAGCCCAGAGAAAAATGAACGACACACATGT 1653  
 pkr\_chi ATACTAAGGACCTTGACTGTGTGGAAGAAAAGCCCAGAGAAAAATGAACGACACACATGT 1656  
 pkr\_bon ATACTAAGGACCTTGACTGTGTGGAAGAAAAGCCCAGAGAAAAATGAACGACACACATGT 1656  
 pkr\_gor ATACTAAGGACCTTGACTGTGTGGAAGAAAAGCCCAGAGAAAAATGAACGACACACATGT 1653  
 pkr\_ora ATACTAAGCACCTTGACTGTGTGGAAGAAAAGCCCAGAGAAAAATGAACGACACACATGT 1653  
 pkr\_agi ATACTAAGCACCTTGACTGTGTGGAAGAAAAGCCCAGAGAAAAATGAACGACACACACGT 1653  
 pkr\_wcg ATACTAAGCACCTTGACTGTGTGGAAGAAAAGCCCAGAGAAAAATGAACGACACACACGT 1653  
 pkr\_isi ATACTAAGCACCTTGACTGTGTGGAAGAAAAGCCCAGAGAAAAATGAACGACACACACGT 1653  
 pkr\_smg ATACTAAGCACCTTGACTATGTGGAAGAAAAGCCCAGAGAAAAA---CGACATACATGT 1662  
 pkr\_rhe ATACTAAGCACCTTGACTACGTGGAAGAAAAGCCCAGAGAAAAA---CGACATACATAT 1662  
 pkr\_tal ATACTAAGCACCTTGACTACGTGGAAGAAAAGCCCAGAGAAAAAGGAACGACATACATGT 1650  
 pkr\_pat ATACTAAGCACCTTGACTACGTGGAAGAAAAGCCCAGAGAAAAAGGAACGACATACATGT 1650  
 pkr\_agm ATACTAAGCACCTTGACTACGTGGAAGAAAAGCCCAGAGAAAAAGGAACGACATACATGT 1650  
 pkr\_flg ATACTAAGCACCTTGACTACGTGGAAGAAAATCCCAGAGAAAAAGGAACGACATACATGT 1650  
 pkr\_col ATACTAAGCACCTTGACTACGTGGAAGAAAAGCCCAGAGAAAAAGGAACGACATACATGT 1650  
 pkr\_woo ATACTAAGCACCTTGACTATATGGAAAAAAACC AAGAGAAAAAGGAACGAAAACAGTGT 1656  
 pkr\_spi ATACTAAGCACCTTGACTATATGGAAAAAAACC AAGAGAAAAAGGAACGAAAACACATGT 1656  
 pkr\_tit ATACTAAGCACCTTGACTATGTGGAAAAAAACC AAGAGAAAAAGGAACGAAAACACATGT 1653  
 pkr\_owl ATACTAAGCACCTTGCTATGTGGAAAAAAACC AAGAGAAAAAGGAACGAAAACACATAT 1656  
 pkr\_tam ATACTAAGCACCTTGCTATGTGGAAAAAAACC AAGAGAAAAAGGAACGAAAACACATAT 1656  
 pkr\_mar ATACTAAGCACCTTGCTATGTGGAAAAAAACC AAGAGAAAAATGAACGAAAACACATAT 1656  
 \*\*\*\*\* \*\*\*\*\* \*\* \*\*\*\*\* \*\*\* \*\* \*\*\*\*\* \* \* \*\* \* \*\*\*\*\*

|          |          |
|----------|----------|
| pk_r_hum | TAG 1656 |
| pk_r_chi | TAG 1659 |
| pk_r_bon | TAG 1659 |
| pk_r_gor | TAG 1656 |
| pk_r_ora | TAG 1656 |
| pk_r_agi | TAG 1656 |
| pk_r_wcg | TAG 1656 |
| pk_r_isi | TAG 1656 |
| pk_r_smg | TAG 1665 |
| pk_r_rhe | TAG 1665 |
| pk_r_tal | TAG 1653 |
| pk_r_pat | TAG 1653 |
| pk_r_agm | TAG 1653 |
| pk_r_flf | TAG 1653 |
| pk_r_col | TAG 1653 |
| pk_r_woo | TAG 1659 |
| pk_r_spi | TAG 1659 |
| pk_r_tit | TAG 1656 |
| pk_r_owl | TAG 1650 |
| pk_r_tam | TAG 1659 |
| pk_r_mar | TAG 1659 |

\*\*\*



```

pkr_hum      CASGVHGPEGFHYKCKMGQKEYSIGTGSTKQEAKQLAAKLAYLQI-LSEETSVKSDYLSS 179
pkr_chi      CASGVHGPEGFHYKCKMGQKEYSIGTSSTKQEAKQLAAKLAYLQI-LSEETSVKSDYLSS 179
pkr_bon      CASGVHGPEGFHYKCKMGQKEYSIGTSSTKQEAKQLAAKLAYLQI-LSEETSVKSDYLSS 179
pkr_gor      CASGVHGPEGFHYKCKMGQKEYSIGTGSTKQEAKQLAAKLAYLQI-VSEETSVKSDYLSS 179
pkr_ora      CASGVHGLEGFHYKCKMGQKEYSIGTGSTKQEAKQLAAKFAYLQI-LSEESSVKSDSMSS 179
pkr_agi      CGWGMHGTGKFHYKCKMGQKEYSIATGSTKQEAKQLAAKLAYVQI-LSEDTSVKSDSMSS 179
pkr_wcg      CVSGVHGPKGFHYKCKMGQKEYSIGTGSTKQEAKQLAAKLAYVQI-LSEDTSVKSDSMSS 179
pkr_isi      CGWGVHGPKGFHYKCKMGQKEYSIATGSTKQEAKQLAAKLAYVQI-LSEDTSVKSDSMSS 179
pkr_smg      CTSGVHGPEGFHYKCKIGDKEYGIGTGSSKQEAKQLAAKLALLEI--SEETSVKPDMSMP 178
pkr_rhe      CTSGVHGPEGFHYKCKIGDKEYGIGTGSSKQEAKQLAAKLALLEI--SEETSVKPDMSMP 178
pkr_tal      CTLGVHGPEGFHYKCKIGDKEYSIGTGSTKQEAKQLAAKLALLEI--SEETSVKPDMSMP 178
pkr_pat      CTSGVHGPEGFHYKCKIGEKEYSIGTGSTKQEAKQLAAKLALLEI--SEETSVKPDMSMP 178
pkr_agm      CTSGVHGPEGFHYKCKIGEKEYSIGTGSTKQEAKQLAAKLALLEI--SEETSVKPDMSMP 178
pkr_flf      CISGVHGPEGFHYKCKMGQKEYSIGTGSTKQEAKQLAAKFALFEI--SKETSVKPDMSMP 178
pkr_col      CISGVHGPEGFHYKCKMGQKEYSIGTGSTKQEAKQLAAKFALFEI--SKETSVKPDMSMP 178
pkr_woo      CASGLNGPEGFHYKCKVQKEYGIGTGSTKQEAKQLAAKLAYLQIHKSEETSVKADSISS 180
pkr_spi      CVSGMNGPEGFHYKCKVQKEYGIGTGSTKQEAKQLAAKLAYLQIHKSEETSVKADSISS 180
pkr_tit      CASGVNGPEGFHYKCKVQKEYGIATGSTKQEAKQLAAKLAYLQIHKSEETSVKADSISS 179
pkr_owl      CASGVNPGAGFHYKCKVQKEYGIGTGSTKQEAKQMAAKLAYLQIHKSEETSVKADSISS 180
pkr_tam      CASGVNGPEGFHYKCKVQKEYGIGTGSTKQEAKQLAAKLAYLQIRKSEETSVKADSTSS 180
pkr_mar      CASGVNGPEGFHYKCKVQKEYGIGTGSTKQEAKQLAAKLAYLQIHKSEETSVKADSTSS 180
* : : * * * * * : : * * * * * . * . * . * : * * * * * : * * * * * : : * * * : : * * * * * . * . *

```

```

pkr_hum      GSFATTCEQSNSLV-TSTLASESSSEGFDSADTSEINSNSDSLNS-SLLMNGLRNNQRK 238
pkr_chi      GSFATTCDQSNSLV-TSTLASESSSEGFDSADTSEINSNSDSLNS-SLLMNGLRNNQRK 238
pkr_bon      GSFATTCDQSNSLV-TSTLASESSSEGFDSADTSEINSNSDSLNS-SLLMNGLRNNQRK 238
pkr_gor      GSFATTCDQSNSLV-TSTLASESSSEGFDSADTSEINSNSDSLNS-SLLMNGLRNNQRK 238
pkr_ora      GYFAATCDQSNCLV-TSTLGSESSSEDFSDTSEINSNSDSLKN-SLLMNGLRNNQRK 238
pkr_agi      GSFAATCDQSSSLV-TSTLASASSSEGFDSADTSEINSNSDSLNN-SLLMNGLRNNQRK 238
pkr_wcg      GSFAATCDQSSSLV-TSTLASASSSEGFDSADTSEINSNSDSLNN-SLLMNGLRNNQRK 238
pkr_isi      DSFAATCDQSSSLV-TSTLASASSSEGFDSADTSEINSNSDSLNN-SLLMNGLRNNQRK 238
pkr_smg      GSFAATCDQSNNPLV-NNSLASESSSESDVPADTSEINSNSSSLHI-SSLFTNGLRNNQRK 237
pkr_rhe      GSFAATCDQSNNPLV-NNSLASESSAESDVSADTSEINSKSGSLHI-SSLFTNGLRNNQRK 237
pkr_tal      GSFAATCDQSNNPLV-NNSLASESSSENDVSDTSEINSNSGSLNN-SSLFTNGLRNNQRK 237
pkr_pat      GSFAAMCDQSNNPLV-NNSLASESSSENDVSDTSEINSNSGSLNK-SSLFTNGLRNNQRK 237
pkr_agm      GSFAATCDQSNNPLV-NNSLASESSSENDVSDTSEINSNSGSLNK-SSLFTNGLRNNQRK 237
pkr_flf      GSFAATCDQSNNPLV-NNSLASESSSEGDVSDTSEINSNSGSLNN-SSLFTNGLRNNQKK 237
pkr_col      GSFAATCDSPSNPLV-NNSLADSSSESDVSDTSEINSNSGSLNN-SSLFTNGLRNNQKK 237
pkr_woo      VSFTPMCDIQNNSIV-TSTLASESLPEGGFSADTSEINCNN-SLNNCSFVSVNGLRNNQRK 239
pkr_spi      VSFTPMCDIQNNSFV-TSTLASESLPESGFSADTSEINCNN-SLNNCSLSMNGLRNNQRK 239
pkr_tit      GSFAPVSDIQNNSLV-TSTLASEPTQSSFSADTSEINCNN-SLNNCSLSMNGLRNNQRK 238
pkr_owl      GAFTPVCDIQNNSVTTSTLASESSPESSFSADTSEITCNN-SLNNCSLSMNGLRNNQRK 240
pkr_tam      VSFTPVCDIQNNPLV-TSTLASESSPESSFSADTSEINCNN-SLNNCSLSMNGLRNNQKK 239
pkr_mar      VSFTPVCDIQNNPLV-TSTLASESSPESSFSADTSEINFNN-SLNNCSLSMNGLRNNQRK 239
* : . : . . * . . * . * . . . . . * * * * * . : . * * * * * * * * * * . * : *

```



```

pkr_hum      ---SKTKCLFIQMEFCDKGTLEQWIEKRRGEKLDKVLALELFEQITKGVVDYIHSKKLIHR 413
pkr_chi      ---SKTKCLFIQMEFCDKGTLEQWIEDRRGKKLDDKVLALELFEQITKGVVDYIHSKKLIHR 413
pkr_bon      ---SKTKCLFIQMEFCDKGTLEQWIEDRRGKKLDDKVLALELFEQITKGVVDYIHSKKLIHR 413
pkr_gor      ---SKTKCLFIQMEFCDKGTLEQWIENRRGEKLDKVLALELFEQITKGVVDYIHSKKLIHR 413
pkr_ora      ---SRTKCLFIQMEFCDKGTLEQWIDNTRGKKLDDKVLALELFEQITKGVVDYIHSKKLIHR 413
pkr_agi      ---SKTKCLFIQMEFCDKGTLEQWIDNRRGKLNDDKVLALELFEQITKGVVDYIHSKKLIHR 413
pkr_wcg      ---SKTKCLFIQMEFCDKGTLEQWIDNRRGKKLDDKVLALELFEQITKGVVDYIHSKKLIHR 413
pkr_isi      ---SKTKCLFIQMEFCDKGTLEQWIDNRRGKKLDDKVLALELFEQITKGVVDYIHSKKLIHR 413
pkr_smg      IPRSKTKCLFIQMEFCEEGLTEKWLEDRRGKKLDDKVLALELFEQITKGLDYIHSKNIHR 417
pkr_rhe      IPRSKTKCLFIQMEFCEDGTLEDWLDRRGKELDDKVLALELFEQITKGLDYIHSKNIHR 417
pkr_tal      ---SKTKCLFIQMEFCEKGTLEEWIEDRKGKKLDDKVLALELFEQITKGLDYIHSKNIHR 412
pkr_pat      ---SKTKCLFIQMEFCEKGTLEEWIEDRKGKKLDDKVLALELFEQITKGLDYIHSKNIHR 412
pkr_agm      ---SKTKCLFIQMEFCEKGTLEEWIEDRKGKKLDDKVLALELFEQITKGLDYIHSKNIHR 412
pkr_flf      ---LTKCLFIQMEFCEKGTLEQWIENRRGEKLDKVLALELFEQITKGVVDYIHSKNIHR 412
pkr_col      ---SKTKCLFIQMEFCEKGTLEEWIEDRRGKKLDDKVLALELFEQITKGVVDYIHSKNIHR 412
pkr_woo      ---STTKCLFIQMEFCDKGTLEQWIEDRRGKKLDDKALSLEFFEQITTGVDYIHSKNIHR 414
pkr_spi      ---STTKCLFIQMEFCDKGTLEQWIEDRRGKKLDDKILSLEFFEQITTGVDYIHSKNIHR 414
pkr_tit      ---STANCLFIQMEYCDKGTLEQWIEDRRGKKLDDKVLSEFFEQITTGVDYIHSKNIHR 413
pkr_owl      ---STTKCLFIQMEFCDKGTLEQWIDRRGKELDDKVLSEFFEQITTGVDYIHSKNIHR 415
pkr_tam      ---STTKCLFIQMEFCDKGTLEQWIEDRRGKKLDDKVLSEFFEQITTGVDYIHSKNIHR 414
pkr_mar      ---STTKCLFIQMEFCDKGTLEQWIEDRRGKKLDDKVLSEFFEQITTGVDYIHSKNIHR 414
                :*:*****:*.:.****.*:~:  :*:~*** *:*~:*****.*:*****:~:***

```

```

pkr_hum      DLKPSNIFLVDTKQVKIGDFGLVTSLNKNDGKRTRRSKGTLLRYMSPEQISSQDYGKEVDLYA 473
pkr_chi      DLKPSNIFLVDTKQVKIGDFGLVTSLNKNDGKRTRRSKGTLLRYMSPEQISSQDYGKEVDLYA 473
pkr_bon      DLKPSNIFLVDTKQVKIGDFGLVTSLNKNDGKRTRRSKGTLLRYMSPEQISSQDYGKEVDLYA 473
pkr_gor      DLKPSNIFLVDTKQVKIGDFGLVTSLNKNDGKRTRRSKGTLLRYMSPEQISSQDYGKEVDLYA 473
pkr_ora      DLKPSNIFLVDTKQVKIGDFGLVTSLTNDVQRTRNTGTLLRYMSPEQISSQDYGKEVDLYA 473
pkr_agi      DLKPSNIFLVDTKQVKIGDFGLVTSLNKNDGKRTRNTGTLLRYMSPEQISSQDYGKEVDLYA 473
pkr_wcg      DLKPSNIFLVDTKQIKIGDFGLVTSLNKNDGKRTRSTGTLLRYMSPEQISSQDYGKEVDLYA 473
pkr_isi      DLKPSNIFLVDTKQIKIGDFGLVTSLKTDGKRTRNTGTLLRYMSPEQISSQDYGKEVDLYA 473
pkr_smg      DLKPSNIFLVDTNQIKIGDFGLATSLKNDVKRTRNTGTLLRYMSPEQISSQDYGKEVDLYA 477
pkr_rhe      DLKPSNIFLVDTKQIKIGDFGLATSLKNDVKRTRNTGTLLRYMSPEQISSQDYGKEVDLYA 477
pkr_tal      DLKPSNIFLVDTKQIKIGDFGLATSLKNDGKRTRNTGTLLRYMSPEQISSQDYGKEVDLYA 472
pkr_pat      DLKPSNIFLVDTKQIKIGDFGLATSLKNDGKRTRNTGTLLRYMSPEQISSQDYGKEVDLYA 472
pkr_agm      DLKPSNIFLVDTKQIKIGDFGLATSLKNDGKRTRNTGTLLRYMSPEQISSQDYGKEVDLYA 472
pkr_flf      DLKPSNIFLVDTKQIKIGDFGLATSLKNDGKRTRNTGTLLRYMSPEQISSQDYGKEVDLYA 472
pkr_col      DLKPSNIFLVDTKQIKIGDFGLATSLKNDGKRTRSTGTLLRYMSPEQISSQDYGKEVDLYA 472
pkr_woo      DLKPSNIFLVDTKQIKIGDFGLVTSLNKNDGKRTRNTGTLLRYMSPEQISSQDYGKEVDLYA 474
pkr_spi      DLKPSNIFLVDTKQIKIGDFGLVTSLNKNDGKRTRNTGTLLRYMSPEQISSQDYGKEVDLYA 474
pkr_tit      DLKPSNIFLVDTKQIKIGDFGLVTSLENDEKRTRNTGTLLRYMSPEQISSQDYGKEVDLYA 473
pkr_owl      DLKPSNIFLVDTKQIKIGDFGLVTSLNKNDGKRTRNTGTLLRYMSPEQISSQDYGKEVDLYA 475
pkr_tam      DLKPSNIFLVDTKQIKIGDFGLVTSLNKNDGKRTRNTGTLLRYMSPEQISSQDYGKEVDLYA 474
pkr_mar      DLKPSNIFLVDTKQIKIGDFGLVTSLNKNDGKRTRNTGTLLRYMSPEQISSQDYGKEVDLYA 474
                ***** :*:*****.*** .* *:~: . ** ***** * :*:*****

```

pkr\_hum LGLILAE LLHVCDTAFETSKFFFDLRDGIISDI-FDKKEK TLLQKLLSKKPEDRPNTSEI 532  
 pkr\_chi LGLILAE LLHVCDTAFETSKFFFDLRDGIISDILFDKKEK TLLQKLLSKKPEDRPNTSEI 533  
 pkr\_bon LGLILAE LLHVCDTAFETSKFFFDLRDGIISDILFDKKEK TLLQKLLSKKPEDRPNTSEI 533  
 pkr\_gor LGLILAE LLHVCDTAFETSKFFFDLRDGIISDI-FDKKEK TLLQKLLSKKPEDRPNTSEI 532  
 pkr\_ora LGLILAE LLHVCDTASETAKFFFDLRDGIISDI-FDKKEK TLLQKLLSKKPEDRPNTSEI 532  
 pkr\_agi LGLILAE LLHVCDTASETAKFFFDLRDGIISDV-FDKKEK TLLQKLLSKKPEDRPNTSEI 532  
 pkr\_wcg LGLILAE LLHVCDTAYETAKFFFDLRDGIISDV-FDKKEK TLLQKLLSKKPEDRPNTSEI 532  
 pkr\_isi LGLILAE LLHVCDTAYETAKFFFDLRDGIISDV-FDKKEK TLLQKLLSKKPEDRPNTSEI 532  
 pkr\_smg LGLILAE LLYVCDTASET SKLFQDLRGGIISDV-FDKREK S LLEKLLSKRPEDRPNTSEI 536  
 pkr\_rhe LGLILAE LLYVCDTASETLQ LFRDLRGGTISDV-YDKREK TLLKLLSKKPEDRPNTSEI 536  
 pkr\_tal LGLILAE LLHVCDTASET SKFFFDLRDGTISDV-FDKREK T LLEKLLSKKPEDRPNTSEI 531  
 pkr\_pat LGLILAE LLHVCDTASET SKFFFDLRDGTISDV-FDKREK T LLEKLLSKKPEDRPNTSEI 531  
 pkr\_agm LGLILAE LLHVCDTASET SKFFFDLRDGTISDV-FDKREK T LLEKLLSKKPEDRPNTSEI 531  
 pkr\_flf LGLILAE LLHVCDTAFETSEFFFDLRDGVISDV-FDKREK T LLEKLLSKKPEDRPNTSEI 531  
 pkr\_col LGLILAE LLHVCDTAFETSEFFFDLRDGVISDV-FDKREK T LLEKLLSKKPEDRPNTSEI 531  
 pkr\_woo LGLIFAE LLHVCDTALET SKFFFDLRDGIISDM-FDKREK TLLRLLSKKPEDRPNTSEI 533  
 pkr\_spi LGLIFAE LLHVCDTALET SKFFFDLRDGIISDM-FDKREK TLLRLLSKKPENRPNTSEI 533  
 pkr\_tit LGLIFAE LLHVCDTASET SKFFFDLRNGIISDM-FDKQE K TLLRLLSKKPGERPNTSEI 532  
 pkr\_owl LGLIFAE LLHVCNTALET SKFFGD LRNGITS DM-FDKREK TLLRLLSEKPEDRPNTSEI 534  
 pkr\_tam LGLIFAE LLHVCDTALET SKFFFDLRDGIISNM-FDKREK TLLRLLSKKPEDRPNTSEI 533  
 pkr\_mar LGLIFAE LLHVCDTALET SKFFFDLRDGVISDT-FDKREK TLLRLLSKKPEDRPNTSEI 533  
 \*\*\*\*:\*\*\*\*:\*\*\*:\*\* \* \* ::\* \*\*\*. \* \* : :\*\*\*:\*\*:\*\*:\*\*:\*\*:\*\*:\*\*:\*\*:\*\*:\*\*:\*\*

pkr\_hum LRTLTVWKK SPEKNERHTC 551  
 pkr\_chi LRTLTVWKK SPEKNERHTC 552  
 pkr\_bon LRTLTVWKK SPEKNERHTC 552  
 pkr\_gor LRTLTVWKK SPEKNERHTC 551  
 pkr\_ora LSTLTVWKK SPEKNERHTC 551  
 pkr\_agi LSTLTVWKK SPEKNERHTR 551  
 pkr\_wcg LSTLTVWKK SPEKNERHTR 551  
 pkr\_isi LSTLTVWKK SPEKNERHTR 551  
 pkr\_smg LSTLTMWKK SPEKK-RHTC 554  
 pkr\_rhe LSTLTTWKK SPEKK-RHTY 554  
 pkr\_tal LSTLTTWKK SPEKKERHTC 550  
 pkr\_pat LSTLTTWKK SPEKKERHTC 550  
 pkr\_agm LSTLTTWKK SPEKKERHTC 550  
 pkr\_flf LSTLTTWKK IPEKKERHTC 550  
 pkr\_col LSTLTTWKK SPEKKERHTC 550  
 pkr\_woo LSTLTIWKK NQEKKERNTC 552  
 pkr\_spi LSTLTIWKK NQEKKERNTC 552  
 pkr\_tit LSTLTMWKK NP KKKELNTC 551  
 pkr\_owl LSTLAMWKK NP EEKE---- 549  
 pkr\_tam LSTLAMWKK HPEKNERNTY 552  
 pkr\_mar LSTLAMWKK HPEKNERNTY 552  
 \* \*\* : \*\*\* : : :
